# Supplementary material for: A global transform for the general formulation of liquid viscosities with significant linearizing benefits: a case study on ionic liquid mixtures
Source: Royal Society of Chemistry journal article supplement (doi:10.1039/d1cp02033a), 2021-01-01
Supplement: d1cp02033a2.xlsx [file d1cp02033a2.xlsx]

## Sheet: Table S1.A
No.	Binary System	No. of Isotherms	No. of Data Points	Solute Mw	IL Mw	T Range (K)	x1 Range	Reference (DOI)
1	Water + 1-ethylpyridinium triflate	8	45	18.02	257.23	293.15 - 353.15	0.00 - 0.93	10.1016/j.fluid.2015.06.043
2	Water + butylammonium acetate	5	55	18.02	133.19	293.15 - 313.15	0.00 - 0.97	10.1016/j.jct.2013.05.019
3	Water + 1-butyl-1-methylpyrrolidinium dicyanamide	10	150	18.02	208.31	298.15 - 343.15	0.00 - 0.93	10.1016/j.jct.2013.10.034
4	Water + 1-ethyl-1-methylpiperidinium ethyl sulfate	10	110	18.02	253.36	298.15 - 343.15	0.00 - 0.89	10.1016/j.tca.2014.02.019
5	Water + 1-butyl-1-methylpiperidinium dicyanamide	10	90	18.02	222.34	298.15 - 343.15	0.00 - 0.91	10.1016/j.jct.2013.10.034
6	Water + 1-butyl-4-methylpyridinium thiocyanate	6	84	18.02	208.32	298.15 - 348.15	0.00 - 0.99	10.1007/s10953-012-9875-7
7	Water + 1,2-dimethyl-3-propylimidazolium tetrafluoroborate	8	80	18.02	226.03	298.15 - 343.15	0.00 - 0.90	10.1021/je800965t
8	Water + 1-ethyl-3-methylimidazolium thiocyanate	7	77	18.02	169.25	288.15 - 318.15	0.00 - 0.95	10.1016/j.jct.2016.12.008
9	Water + 3-hexyl-1-methyl-1H-imidazolium bromide	5	80	18.02	247.18	293.15 - 333.15	0.00 - 0.99	10.1016/j.jct.2010.03.002
10	Water + 1-ethyl-3-methylimidazolium dicyanamide	7	77	18.02	177.21	288.15 - 318.15	0.00 - 0.95	10.1016/j.jct.2016.12.008
11	Water + 1-butyl-3-methylimidazolium tricyanomethane	9	81	18.02	229.29	278.15 - 358.15	0.00 - 0.56	10.1021/je900632q
12	Water + 1H-imidazolium octanoate	7	70	18.02	212.29	293.15 - 323.15	0.00 - 0.82	10.1021/je100671v
13	Water + 1-butyl-3-methylimidazolium trifluoromethanesulfonate	7	70	18.02	288.29	303.15 - 343.15	0.00 - 0.90	10.1021/je8003832
14	Water + 1-ethyl-1-methylpyrrolidinium ethyl sulfate	7	70	18.02	239.33	313.15 - 343.15	0.00 - 0.97	10.1016/j.tca.2014.02.019
15	Water + 1-ethyl-3-methylimidazolium tetrafluoroborate	4	40	18.02	197.97	288.15 - 318.15	0.00 - 0.90	10.1021/je900600c
16	Water + 1-butyl-3-methylimidazolium thiocyanate	6	66	18.02	197.3	298.15 - 348.15	0.00 - 0.94	10.1007/s10953-012-9875-7
17	Water + 2-hydroxyethylammonium lactate	6	66	18.02	151.16	303.15 - 328.15	0.00 - 0.95	10.1021/je3009073
18	Water + 1,1,3,3-tetramethylguanidinium lactate	6	66	18.02	205.26	303.15 - 328.15	0.00 - 0.95	10.1021/je3009073
19	Water + 1-butyl-3-methylimidazolium tetrafluoroborate	10	70	18.02	226.03	293.15 - 373.15	0.00 - 0.40	10.1016/j.molliq.2016.08.084
20	Water + ethylammonium nitrate	6	60	18.02	108.1	293.15 - 318.15	0.00 - 0.95	10.1007/s10953-014-0283-z
21	Water + 1-butyl-3-methylimidazolium dicyanamide	9	63	18.02	205.26	278.15 - 358.15	0.00 - 0.48	10.1021/je900632q
22	Water + 1-butyl-1-methylpyrrolidinium thiocyanate	6	54	18.02	200.34	298.15 - 348.15	0.00 - 0.97	10.1007/s10953-012-9875-7
23	Water + 1-butylpyridinium tetrafluoroborate	4	52	18.02	223.02	293.15 - 323.15	0.00 - 0.95	10.1016/j.jct.2016.04.003
24	Water + 1-methylimidazolium acetate	5	50	18.02	142.16	293.15 - 313.15	0.00 - 0.95	10.1016/j.molliq.2014.05.027
25	Water + 1,1,3,3-tetramethylguanidinium imidazol-1-ide	5	50	18.02	183.26	293.15 - 313.15	0.00 - 0.95	10.1016/j.jct.2016.01.012
26	Water + 1-propylpyridinium tetrafluoroborate	4	48	18.02	208.99	293.15 - 323.15	0.00 - 0.95	10.1016/j.jct.2016.04.003
27	Water + 1-ethyl-3-methylimidazolium acetate	4	44	18.02	170.21	298.15 - 343.15	0.00 - 0.91	10.1016/j.jct.2012.02.027
28	Water + 1-ethyl-3-methylimidazolium trifluoromethanesulfonate	6	36	18.02	260.23	298.15 - 348.15	0.00 - 0.94	10.1021/je0602824
29	Water + 1-ethyl-3-methylimidazolium trifluoroacetate	7	42	18.02	224.18	288.15 - 348.15	0.00 - 0.93	10.1021/je0602824
30	Water + n-butylammonium nitrate	5	45	18.02	136.15	293.15 - 313.15	0.00 - 0.90	10.1016/j.jct.2013.05.019
31	Water + 1-methyl-3-octylimidazolium chloride	4	40	18.02	230.78	298.15 - 343.15	0.00 - 0.96	10.1021/je050460d
32	Water + 1-hexyl-3-methylimidazolium chloride	4	36	18.02	202.73	298.15 - 343.15	0.00 - 0.94	10.1021/je050460d
33	Water + 1,3-dimethylimidazolium methylsulfate	3	36	18.02	208.23	298.15 - 328.15	0.00 - 0.95	10.1016/j.jct.2008.04.006
34	Water + 1-butyl-3-methylimidazolium acetate	7	30	18.02	198.27	303.15 - 363.15	0.00 - 0.80	10.1021/jp3100377
35	Water + 1-butyl-3-methylimidazolium methyl sulfate	3	33	18.02	250.31	298.15 - 328.15	0.00 - 0.95	10.1016/j.jct.2008.03.013
36	Water + 1-butyl-4-methylpyridinium tetrafluoroborate	6	24	18.02	237.05	298.15 - 323.15	0.00 - 0.80	10.1007/s10953-009-9390-7
37	Water + 1-hexyl-3-methylimidazolium tetrafluoroborate	4	36	18.02	254.08	288.15 - 318.15	0.00 - 0.72	10.1021/je900600c
38	Water + 1-ethyl-3-methylimidazolium ethyl sulfate	3	27	18.02	236.29	298.15 - 328.15	0.00 - 0.95	10.1021/je060228n
39	Water + (3-aminopropyl)tributylphosphonium L-leucinate	6	24	18.02	390.59	298.15 - 343.15	0.00 - 0.75	10.1021/je2007549
40	Water + (3-aminopropyl)tributylphosphonium L-valinate	6	24	18.02	376.57	298.15 - 343.15	0.00 - 0.75	10.1021/je2007549
41	Water + (3-aminopropyl)tributylphosphonium L-alaninate	6	24	18.02	348.51	298.15 - 343.15	0.00 - 0.75	10.1021/je2007549
42	Water + 1-butyl-1-methylpiperidinium thiocyanate	4	32	18.02	214.37	318.15 - 348.15	0.00 - 0.94	10.1007/s10953-012-9875-7
43	Methanol + N-(bis(dimethylamino)methylene)-N-ethylethanaminium bis((trifluoromethyl)sulfonyl)amide	7	70	32.04	452.43	293.15 - 323.15	0.00 - 0.90	10.1016/j.jct.2019.04.023
44	Methanol + 1-butyl-1-methylpyrrolidinium bis[(trifluoromethyl)sulfonyl]imide	6	114	32.04	422.4	293.15 - 318.15	0.00 - 0.95	10.1007/s11581-010-0511-5
45	Methanol + N,N-dimethyl-N-(3-sulfopropyl)cyclohexanaminium 4-methylbenzenesulfonate	6	30	32.04	421.57	303.15 - 328.15	0.00 - 0.98	10.1016/j.molliq.2016.12.089
46	Methanol + 1-methyl-1-(3-(trimethylammonio)propyl)piperidinium dicyanamide	5	50	32.04	332.46	293.15 - 333.15	0.00 - 0.90	10.1021/acs.jced.8b00965
47	Methanol + 1-(3-(trimethylammonio)propyl)pyridinium dicyanamide	5	50	32.04	312.38	293.15 - 333.15	0.00 - 0.90	10.1021/acs.jced.8b00965
48	Methanol + 1-ethyl-3-methylimidazolium tetrafluoroborate	5	70	32.04	197.97	278.15 - 318.15	0.00 - 0.95	10.1016/j.jct.2015.06.036
49	Methanol + 1,3-dimethylimidazolium dimethylphosphate	7	70	32.04	222.18	293.15 - 323.15	0.00 - 0.90	10.1021/je401124t
50	Methanol + 1-butyl-3-methylimidazolium tetrafluoroborate	5	70	32.04	226.03	278.15 - 318.15	0.00 - 0.95	10.1016/j.jct.2015.06.036
51	Methanol + 1-ethyl-3-methylimidazolium ethyl sulfate	6	60	32.04	236.29	298.15 - 323.15	0.00 - 0.89	10.1016/j.fluid.2017.01.019
52	Methanol + 1-ethyl-3-methylimidazolium bis((trifluoromethyl)sulfonyl)imide	6	60	32.04	391.3	298.15 - 323.15	0.00 - 0.90	10.1016/j.molliq.2016.09.077
53	Methanol + 1-butyl-3-methylimidazolium bis(trifluoromethylsulfonyl)imide	6	60	32.04	419.36	298.15 - 323.15	0.00 - 0.90	10.1016/j.molliq.2016.06.088
54	Methanol + trihexyl(tetradecyl)phosphonium chloride	5	60	32.04	519.32	295.15 - 313.15	0.00 - 0.98	10.1016/j.jct.2015.09.030
55	Methanol + 1-propylpyridinium tetrafluoroborate	4	52	32.04	208.99	293.15 - 323.15	0.00 - 0.95	10.1021/je401120a
56	Methanol + 1,1,3,3-tetramethylguanidinium imidazol-1-ide	5	50	32.04	183.26	293.15 - 313.15	0.00 - 0.95	10.1016/j.jct.2015.04.027
57	Methanol + 1-butyl-3-methylimidazolium thiocyanate	4	48	32.04	197.3	298.15 - 328.15	0.00 - 0.98	10.1021/je8008254
58	Methanol + n-butylammonium nitrate	5	45	32.04	136.15	293.15 - 313.15	0.00 - 0.90	10.1016/j.jct.2012.10.008
59	Methanol + 1-methyl-3-octylimidazolium chloride	3	42	32.04	230.78	298.15 - 328.15	0.00 - 0.98	10.1021/je060123k
60	Methanol + N-ethylpiperazinium propionate	4	40	32.04	188.27	298.15 - 313.15	0.00 - 0.90	10.1021/je201116t
61	Methanol + 1-butyl-4-methylpyridinium tetrafluoroborate	3	36	32.04	237.05	298.15 - 323.15	0.00 - 0.98	10.1023/A:1020217612751
62	Ethanol + N-(bis(dimethylamino)methylene)-N-ethylethanaminium bis((trifluoromethyl)sulfonyl)amide	7	77	46.07	452.43	293.15 - 323.15	0.00 - 0.90	10.1016/j.jct.2019.04.023
63	Ethanol + 1-methyl-1-(3-(trimethylammonio)propyl)piperidinium dicyanamide	5	50	46.07	332.46	293.15 - 333.15	0.00 - 0.90	10.1021/acs.jced.8b00965
64	Ethanol + 1-(3-(trimethylammonio)propyl)pyridinium dicyanamide	5	50	46.07	312.38	293.15 - 333.15	0.00 - 0.90	10.1021/acs.jced.8b00965
65	Ethanol + butylammonium acetate	5	100	46.07	133.19	293.15 - 313.15	0.00 - 0.95	10.1007/s10973-018-7399-0
66	Ethanol + butylammonium formate	5	100	46.07	119.16	293.15 - 313.15	0.00 - 0.95	10.1016/j.jct.2020.106140
67	Ethanol + 1-ethyl-3-methylimidazolium acetate	7	70	46.07	170.21	278.15 - 338.15	0.00 - 0.90	10.1021/ie501956x
68	Ethanol + 2-ethyl-1,1,3,3-tetramethylguanidinium ethyl sulfate	7	70	46.07	269.36	293.15 - 323.15	0.00 - 0.90	10.1021/acs.jced.5b00259
69	Ethanol + 2-ethyl-1,1,3,3-tetramethylguanidinium bis(trifluoromethanesulfonyl)imide	7	70	46.07	424.38	293.15 - 323.15	0.00 - 0.90	10.1021/acs.jced.5b00259
70	Ethanol + 1-ethylpyridinium dicyanamide	7	70	46.07	174.21	288.15 - 318.15	0.00 - 0.90	10.1016/j.jct.2017.07.022
71	Ethanol + 1,3-dimethylimidazolium dimethylphosphate	7	70	46.07	222.18	293.15 - 323.15	0.00 - 0.90	10.1021/je401124t
72	Ethanol + 1H-imidazolium octanoate	7	69	46.07	212.29	293.15 - 323.15	0.00 - 0.90	10.1021/je100671v
73	Ethanol + 1-butyl-3-methylimidazolium thiocyanate	6	58	46.07	197.3	298.15 - 348.15	0.00 - 0.95	10.1021/je8008254
74	Ethanol + 1,1,3,3-tetramethylguanidinium imidazol-1-ide	5	50	46.07	183.26	293.15 - 313.15	0.00 - 0.95	10.1016/j.jct.2015.04.027
75	Ethanol + n-butylammonium nitrate	5	45	46.07	136.15	293.15 - 313.15	0.00 - 0.90	10.1016/j.jct.2012.10.008
76	Ethanol + 1-ethyl-3-methylimidazolium dicyanamide	4	44	46.07	177.21	298.15 - 343.15	0.00 - 0.93	10.1016/j.jct.2012.02.027
77	Ethanol + 1-ethyl-3-methylimidazolium bis((trifluoromethyl)sulfonyl)imide	4	44	46.07	391.3	278.15 - 338.15	0.00 - 0.95	10.1021/je500594z
78	Ethanol + 1-butyl-3-methylimidazolium bis(trifluoromethylsulfonyl)imide	4	44	46.07	419.36	278.15 - 338.15	0.00 - 0.95	10.1021/je500594z
79	Ethanol + 1-butyl-3-methylimidazolium nitrate	11	44	46.07	201.23	283.15 - 333.15	0.00 - 0.60	10.1016/j.molliq.2014.09.006
80	Ethanol + N-ethylpiperazinium propionate	4	40	46.07	188.27	298.15 - 313.15	0.00 - 0.90	10.1021/je201116t
81	Ethanol + 1-butyl-3-methylimidazolium tetrafluoroborate	4	40	46.07	226.03	288.15 - 318.15	0.00 - 0.90	10.1021/je100687x
82	Ethanol + 1-hexyl-3-methylimidazolium tetrafluoroborate	4	40	46.07	254.08	288.15 - 318.15	0.00 - 0.90	10.1021/je100687x
83	Ethanol + 1-methyl-3-octylimidazolium tetrafluoroborate	4	40	46.07	282.13	288.15 - 318.15	0.00 - 0.90	10.1021/je100687x
84	Ethanol + 1,3-dimethylimidazolium methylsulfate	3	36	46.07	208.23	298.15 - 328.15	0.00 - 0.95	10.1016/j.jct.2008.04.006
85	Ethanol + 1-butyl-3-methylimidazolium methyl sulfate	3	36	46.07	250.31	298.15 - 328.15	0.00 - 0.94	10.1016/j.jct.2008.03.013
86	Ethanol + 1-hexyl-3-methylimidazolium bis[(trifluoromethyl)sulfonyl]imide	3	33	46.07	447.41	278.15 - 318.15	0.00 - 0.95	10.1021/je500594z
87	Ethanol + 1-methyl-3-octylimidazolium chloride	3	30	46.07	230.78	298.15 - 328.15	0.00 - 0.98	10.1021/je060123k
88	Ethanol + 1-ethylpyridinium ethyl sulfate	3	30	46.07	233.28	298.15 - 328.15	0.00 - 0.95	10.1021/je800981d
89	Ethanol + 1-ethyl-3-methylimidazolium tetrafluoroborate	4	28	46.07	197.97	288.15 - 318.15	0.00 - 0.46	10.1021/je100687x
90	Propanol + 1-butyl-3-methylimidazolium bis(trifluoromethylsulfonyl)imide	6	60	60.1	419.36	298.15 - 323.15	0.00 - 0.90	10.1016/j.fluid.2018.04.025
91	Propanol + 1-allyl-3-methyl-1H-imidazolium bis((trifluoromethyl)sulfonyl)amide	10	110	60.1	403.31	293.15 - 343.15	0.00 - 0.95	10.1021/acs.jced.8b00537
92	Propanol + triethylsulfonium bis((trifluoromethyl)sulfonyl)imide	11	121	60.1	399.38	293.15 - 343.15	0.00 - 0.95	10.1021/acs.jced.8b00537
93	Propanol + 1-ethyl-3-methylimidazolium methylsulfate	4	28	60.1	222.26	298.15 - 313.15	0.00 - 0.87	10.1021/acs.jced.8b00948
94	Propanol + 1,3-dimethylimidazolium methylsulfate	4	28	60.1	208.23	298.15 - 313.15	0.00 - 0.96	10.1021/acs.jced.8b00948
95	Propanol + butylammonium formate	5	100	60.1	119.16	293.15 - 313.15	0.00 - 0.95	10.1016/j.jct.2020.106140
96	Propanol + 1-ethyl-3-methylimidazolium acetate	7	70	60.1	170.21	288.15 - 348.15	0.00 - 0.90	10.1021/acs.jced.5b01023
97	Propanol + 2-ethyl-1,1,3,3-tetramethylguanidinium bis(trifluoromethanesulfonyl)imide	7	70	60.1	424.38	293.15 - 323.15	0.00 - 0.90	0.1021/acs.jced.5b00259
98	Propanol + 2-ethyl-1,1,3,3-tetramethylguanidinium ethyl sulfate	7	70	60.1	269.36	293.15 - 323.15	0.00 - 0.90	0.1021/acs.jced.5b00259
99	Propanol + 1-ethylpyridinium dicyanamide	7	70	60.1	174.21	288.15 - 318.15	0.00 - 0.90	10.1016/j.jct.2017.07.022
100	Propanol + 1,3-dimethylimidazolium dimethylphosphate	7	70	60.1	222.18	293.15 - 323.15	0.00 - 0.90	10.1021/je401124t
101	Propanol + 1-butyl-3-methylimidazolium thiocyanate	6	66	60.1	197.3	298.15 - 348.15	0.00 - 0.97	10.1021/je8008254
102	Propanol + 1,1,3,3-tetramethylguanidinium imidazol-1-ide	5	50	60.1	183.26	293.15 - 313.15	0.00 - 0.95	10.1016/j.jct.2015.04.027
103	Propanol + n-butylammonium nitrate	5	45	60.1	136.15	293.15 - 313.15	0.00 - 0.90	10.1016/j.jct.2012.10.008
104	Propanol + 1-hexyl-3-methylimidazolium tetrafluoroborate	5	40	60.1	254.08	293.15 - 333.15	0.00 - 0.90	10.1016/j.tca.2011.10.030
105	Propanol + N-ethylpiperazinium propionate	4	40	60.1	188.27	298.15 - 313.15	0.00 - 0.90	10.1021/je201116t
106	Propanol + 1-methyl-3-octylimidazolium chloride	3	36	60.1	230.78	298.15 - 328.15	0.00 - 0.97	10.1021/je060123k
107	Propanol + 1-ethylpyridinium ethyl sulfate	3	33	60.1	233.28	298.15 - 328.15	0.00 - 0.95	10.1021/je800981d
108	Propanol + 1-ethyl-3-methylimidazolium ethyl sulfate	3	30	60.1	236.29	298.15 - 328.15	0.00 - 0.97	10.1021/je700029q
109	Butanol + benzyldimethyldodecylammonium bis(trifluoromethylsulfonyl)imide	11	77	74.12	584.68	298.15 - 348.15	0.00 - 0.85	10.1016/j.fluid.2019.112304
110	Butanol + 1-butyl-3-methylimidazolium bis(trifluoromethylsulfonyl)imide	6	60	74.12	419.36	298.15 - 323.15	0.00 - 0.90	10.1016/j.fluid.2018.04.025
111	Butanol + 1-butyl-3-methylimidazolium trifluoromethanesulfonate	6	60	74.12	288.29	298.15 - 323.15	0.00 - 0.89	10.1007/s10953-016-0490-x
112	Butanol + 1-ethyl-3-methylimidazolium methylsulfate	4	28	74.12	222.26	298.15 - 313.15	0.00 - 0.96	10.1021/acs.jced.8b00948
113	Butanol + 1,3-dimethylimidazolium methylsulfate	4	28	74.12	208.23	298.15 - 313.15	0.00 - 0.94	10.1021/acs.jced.8b00948
114	Butanol + butylammonium formate	5	100	74.12	119.16	293.15 - 313.15	0.00 - 0.95	10.1016/j.jct.2020.106140
115	Butanol + 1-butyl-3-methylimidazolium thiocyanate	6	66	74.12	197.3	298.15 - 348.15	0.00 - 0.97	10.1007/s10953-009-9410-7
116	Butanol + 1-ethyl-3-methylimidazolium ethyl sulfate	6	60	74.12	236.29	298.15 - 323.15	0.00 - 0.89	10.1016/j.fluid.2017.01.019
117	Butanol + 1,1,3,3-tetramethylguanidinium imidazol-1-ide	5	50	74.12	183.26	293.15 - 313.15	0.00 - 0.95	10.1016/j.jct.2015.04.027
118	Butanol + 2-octylisoquinolinium bis((trifluoromethyl)sulfonyl)amide	5	50	74.12	522.52	298.15 - 338.15	0.00 - 0.93	10.1016/j.jct.2011.12.003
119	Butanol + n-butylammonium nitrate	5	45	74.12	136.15	293.15 - 313.15	0.00 - 0.90	10.1016/j.jct.2012.10.008
120	Butanol + N-ethylpiperazinium propionate	4	40	74.12	188.27	298.15 - 313.15	0.00 - 0.90	10.1021/je201116t
121	1,2-Propanediol + choline bis(trifluoromethylsulfonyl)imide	9	63	76.09	384.31	313.15 - 353.15	0.00 - 0.87	10.1021/jp5065243
122	1,2-Propanediol + butyltrimethylammonium bis(trifluoromethylsulfonyl)imide	7	56	76.09	396.36	323.15 - 353.15	0.00 - 0.88	10.1021/jp5065243
123	1,4-Dioxane + 1-ethyl-3-methylimidazolium tetrafluoroborate	8	64	88.11	197.97	293.15 - 353.15	0.00 - 0.67	10.1016/j.jct.2016.06.015
124	Ethylene glycol + 1-ethyl-3-methylimidazolium tetrafluoroborate	8	80	62.07	197.97	293.15 - 353.15	0.00 - 0.88	10.1016/j.jct.2016.06.015
125	Ethylene glycol + 1-butyl-3-methylimidazolium tetrafluoroborate	7	49	62.07	226.03	293.15 - 353.15	0.00 - 0.91	10.1021/je101206u
126	Ethyl Acetate + 1-butyl-3-methylimidazolium tetrachloroferrate	7	70	88.11	336.87	293.15 - 323.15	0.00 - 0.90	10.1016/j.molliq.2017.08.014
127	Ethyl Acetate + 1-butyl-3-methylimidazolium trifluoromethanesulfonate	6	60	88.11	288.29	298.15 - 323.15	0.00 - 0.90	10.1007/s10953-016-0490-x
128	Ethyl Acetate + 1-ethyl-3-methylimidazolium bis((trifluoromethyl)sulfonyl)imide	6	60	88.11	391.3	298.15 - 323.15	0.00 - 0.90	10.1016/j.molliq.2016.09.077
129	Acetonitrile + 1-methyl-1-(3-(trimethylammonio)propyl)piperidinium dicyanamide	10	100	41.05	332.46	288.15 - 333.15	0.00 - 0.90	10.1039/C8RA04127J
130	Acetonitrile + 3-(3-cyanopropyl)-1-methylimidazolium bis(fluorosulfonyl)amide	8	80	41.05	330.32	288.15 - 323.15	0.00 - 0.90	10.1016/j.molliq.2018.07.077
131	Acetonitrile + 1-(3-(trimethylammonio)propyl)pyridinium dicyanamide	11	110	41.05	312.38	283.15 - 333.15	0.00 - 0.90	10.1039/C8RA04127J
132	Acetonitrile + 3-(3-cyanopropyl)-1-methylimidazolium trifluoromethanesulfonate	8	80	41.05	299.27	288.15 - 323.15	0.00 - 0.90	10.1016/j.molliq.2018.07.077
133	Acetonitrile + 1-ethyl-3-methylimidazolium trifluoromethanesulfonate	6	60	41.05	260.23	298.15 - 323.15	0.00 - 0.90	10.1021/acs.jced.7b00429
134	Acetonitrile + 1-hexyl-3-methylimidazolium tetrafluoroborate	7	70	41.05	254.08	293.15 - 343.15	0.00 - 0.90	10.1021/acs.jced.8b00684
135	Acetonitrile + 1-butyronitrile-3-methylimidazolium tetrafluoroborate	8	80	41.05	237.01	288.15 - 323.15	0.00 - 0.90	10.1021/acs.jced.7b00898
136	Acetonitrile + 1-butyl-2,3-dimethylimidazolium thiocyanate	8	80	41.05	211.33	288.15 - 323.15	0.00 - 0.90	10.1021/acs.jced.7b01006
137	Acetonitrile + 1,2-dimethyl-3-propylimidazolium thiocyanate	8	80	41.05	197.3	288.15 - 323.15	0.00 - 0.90	10.1021/acs.jced.7b01006
138	Acetonitrile + 1H-imidazolium octanoate	7	70	41.05	212.29	293.15 - 323.15	0.00 - 0.90	10.1021/je100671v
139	Acetonitrile + 1-ethyl-3-methylimidazolium tetrafluoroborate	7	63	41.05	197.97	293.15 - 343.15	0.00 - 0.83	10.1016/j.jct.2016.06.015
140	Acetonitrile + 1-butyl-3-methylimidazolium trifluoromethanesulfonate	6	60	41.05	288.29	298.15 - 323.15	0.00 - 0.91	10.1021/acs.jced.8b00176
141	Acetonitrile + 1-butyl-2,3-dimethylimidazolium tetrafluoroborate	6	48	41.05	240.05	298.15 - 343.15	0.00 - 0.89	10.1021/je3007474
142	Acetonitrile + 1-butyl-3-methylimidazolium tetrafluoroborate	4	40	41.05	226.03	303.15 - 333.15	0.00 - 0.90	10.1007/s10953-014-0273-1
143	Benzene + 2-octylisoquinolinium bis((trifluoromethyl)sulfonyl)amide	6	72	78.11	522.52	298.15 - 348.15	0.00 - 0.90	10.1524/zpch.2013.0326
144	Benzene + 1-butyl-3-methylimidazolium trifluoromethanesulfonate	4	24	78.11	288.29	298.15 - 328.15	0.00 - 0.57	10.1016/j.molliq.2013.10.014
145	Benzene + 1-butyl-3-methylimidazolium thiocyanate	4	20	78.11	197.3	298.15 - 328.15	0.00 - 0.51	10.1016/j.molliq.2013.10.014
146	Benzene + 1-ethyl-3-methylimidazolium bis((trifluoromethyl)sulfonyl)imide	4	20	78.11	391.3	298.15 - 328.15	0.00 - 0.49	10.1016/j.molliq.2013.10.014
147	Pyridine + 1-ethyl-3-methylimidazolium acetate	11	88	79.1	170.21	303.15 - 353.15	0.00 - 0.83	10.1016/j.molliq.2019.03.144
148	Pyridine + 1-methyl-3-octylimidazolium chloride	11	88	79.1	230.78	303.15 - 353.15	0.00 - 0.87	10.1021/acs.jced.7b00002
149	Pyridine + 1-hexyl-3-methylimidazolium chloride	11	88	79.1	202.73	303.15 - 353.15	0.00 - 0.86	10.1016/j.jct.2017.07.016
150	Pyridine + 2-octylisoquinolinium bis((trifluoromethyl)sulfonyl)amide	5	55	79.1	522.52	298.15 - 348.15	0.00 - 0.91	10.1524/zpch.2013.0326
151	Thiophene + 1-(3-hydroxypropyl)pyridinium tricyanomethanide	12	84	84.14	228.25	293.15 - 348.15	0.00 - 0.59	10.1016/j.fluid.2019.112304
152	Thiophene + 1-(2-hydroxyethyl)pyridinium tricyanomethanide	12	84	84.14	214.23	293.15 - 348.15	0.00 - 0.60	10.1016/j.fluid.2019.112304
153	Thiophene + 2-octylisoquinolinium bis((trifluoromethyl)sulfonyl)amide	6	78	84.14	522.52	298.15 - 348.15	0.00 - 0.94	10.1524/zpch.2013.0326
154	Thiophene + 1-butyl-3-methylimidazolium thiocyanate	4	24	84.14	197.3	298.15 - 328.15	0.00 - 0.70	10.1016/j.molliq.2013.10.014
155	Thiophene + 1-butyl-3-methylimidazolium bis(trifluoromethylsulfonyl)imide	4	24	84.14	419.36	298.15 - 328.15	0.00 - 0.77	10.1016/j.molliq.2013.10.014
156	Dimethyl sulfoxide + 1-ethyl-3-methylimidazolium trifluoromethanesulfonate	6	60	78.13	260.23	298.15 - 323.15	0.00 - 0.89	10.1021/acs.jced.7b00429
157	Dimethyl sulfoxide + 1-hexyl-3-methylimidazolium tetrafluoroborate	8	88	78.13	254.08	293.15 - 353.15	0.00 - 0.88	10.1021/acs.jced.8b00684
158	Dimethyl sulfoxide + 1-ethyl-3-methylimidazolium acetate	11	88	78.13	170.21	303.15 - 353.15	0.00 - 0.84	10.1016/j.molliq.2019.03.144
159	Dimethyl sulfoxide + 1-methyl-3-octylimidazolium chloride	11	88	78.13	230.78	303.15 - 353.15	0.00 - 0.87	10.1021/acs.jced.7b00002
160	Dimethyl sulfoxide + 1-hexyl-3-methylimidazolium chloride	11	88	78.13	202.73	303.15 - 353.15	0.00 - 0.86	10.1016/j.jct.2017.07.016
161	Dimethyl sulfoxide + 1-ethyl-3-methylimidazolium tetrafluoroborate	8	80	78.13	197.97	293.15 - 353.15	0.00 - 0.90	10.1016/j.jct.2016.06.015
162	Dimethyl sulfoxide + trimethylammonium dihydrogen phosphate	4	76	78.13	157.11	298.15 - 313.15	0.00 - 0.97	10.1016/j.jct.2012.11.014
163	Dimethyl sulfoxide + trimethylammonium acetate	4	76	78.13	119.16	298.15 - 313.15	0.00 - 0.98	10.1016/j.jct.2012.11.014
164	Dimethyl sulfoxide + trimethylammonium hydrogen sulfate	4	76	78.13	157.18	298.15 - 313.15	0.00 - 0.99	10.1016/j.jct.2012.11.014
165	Dimethyl sulfoxide + 1-butyl-3-methylimidazolium tetrafluoroborate	7	70	78.13	226.03	293.15 - 353.15	0.00 - 0.93	10.1021/je101206u
166	Dimethyl sulfoxide + diethylammonium hydrogen sulfate	5	70	78.13	171.21	298.15 - 328.15	0.00 - 0.94	10.1016/j.fluid.2011.02.010
167	Dimethyl sulfoxide + 1-butyl-2,3-dimethylimidazolium tetrafluoroborate	7	63	78.13	240.05	298.15 - 353.15	0.00 - 0.86	10.1021/je3007474
168	Dimethyl sulfoxide + triethylammonium acetate	3	63	78.13	161.25	298.15 - 308.15	0.00 - 0.98	10.1016/j.molliq.2011.09.019
169	Dimethyl sulfoxide + diethylammonium acetate	3	63	78.13	133.19	298.15 - 308.15	0.00 - 0.99	10.1016/j.molliq.2011.09.019
170	Dimethyl sulfoxide + 1-butyl-3-methylimidazolium bis(trifluoromethylsulfonyl)imide	6	60	78.13	419.36	298.15 - 323.15	0.00 - 0.90	10.1016/j.molliq.2016.06.088
171	Dimethyl sulfoxide + triethylammonium dihydrogen phosphate	3	57	78.13	199.19	298.15 - 308.15	0.00 - 0.98	10.1016/j.tca.2013.02.002
172	Dimethyl sulfoxide + triethylammonium hydrogen sulfate	3	57	78.13	199.26	298.15 - 308.15	0.00 - 0.99	10.1016/j.tca.2013.02.002
173	Dimethylformamide + 1-ethyl-3-methylimidazolium acetate	11	88	73.09	170.21	303.15 - 353.15	0.00 - 0.85	10.1016/j.molliq.2019.03.144
174	Dimethylformamide + 1-methyl-3-octylimidazolium chloride	11	88	73.09	230.78	303.15 - 353.15	0.00 - 0.88	10.1021/acs.jced.7b00002
175	Dimethylformamide + 1-hexyl-3-methylimidazolium chloride	11	88	73.09	202.73	303.15 - 353.15	0.00 - 0.87	10.1016/j.jct.2017.07.016
176	Dimethylformamide + 1-butyl-3-methylimidazolium trifluoromethanesulfonate	6	60	73.09	288.29	298.15 - 323.15	0.00 - 0.89	10.1021/acs.jced.8b00176
177	Dimethylformamide + 1-butyl-3-methylimidazolium hexafluorophosphate	3	30	73.09	284.19	303.15 - 323.15	0.00 - 0.97	10.1016/j.molliq.2016.03.072
178	Dimethylformamide + 1-hexyl-1-methylpyrrolidinium bis(trifluoromethanesulfonyl)imide	7	56	73.09	450.46	295.20 - 325.20	0.00 - 0.70	10.1021/je0504515
179	Dimethylformamide + 1-ethyl-3-methylimidazolium tetrafluoroborate	4	40	73.09	197.97	303.15 - 333.15	0.00 - 0.90	10.1021/acs.jced.5b00753
180	Glycerol + dodecyltriethylphosphonium 2-cyanopyrrolide	4	56	92.09	378.58	293.15 - 313.15	0.00 - 1.00	10.1021/acs.jced.9b00769
181	Glycerol + butyltriethylphosphonium 2-cyanopyrrolide	4	60	92.09	266.37	293.15 - 313.15	0.00 - 1.00	10.1021/acs.jced.9b00769
182	Triethanolamine + tributyl(dodecyl)phosphonium 2-cyanopyrrolide	4	48	149.19	462.75	293.15 - 313.15	0.00 - 0.98	10.1021/acs.jced.9b00769
183	Triethanolamine + dodecyltriethylphosphonium 2-cyanopyrrolide	4	47	149.19	378.58	293.15 - 313.15	0.00 - 0.98	10.1021/acs.jced.9b00769
184	Triethanolamine + butyltriethylphosphonium 2-cyanopyrrolide	4	40	149.19	266.37	293.15 - 313.15	0.00 - 0.98	10.1021/acs.jced.9b00769
	Total:	1104	10909

## Sheet: Table S1.B
No.	IL	No. of Data	TMin. – TMax.	Eq. (23)				AARD (%)	Reference (DOI)
				A	B	C	D
1	(3-aminopropyl)tributylphosphonium L-alaninate	6	298.15 - 343.15	1.36673	0.555557	48339	230.977	0.0164975	10.1021/je2007549
2	(3-aminopropyl)tributylphosphonium L-leucinate	6	298.15 - 343.15	1.18926	0.562582	57380.1	241.735	0.0188648	10.1021/je2007549
3	(3-aminopropyl)tributylphosphonium L-valinate	6	298.15 - 343.15	1.24988	0.580696	62975.1	220.537	0.0185829	10.1021/je2007549
4	1,1,3,3-tetramethylguanidinium imidazol-1-ide	5	293.15 - 313.15	2.02622	0.459696	49566	219.866	0.00823266	10.1016/j.jct.2015.04.027
5	1,1,3,3-tetramethylguanidinium lactate	6	303.15 - 328.15	1.64193	0.321544	43398.9	396.819	0.0240021	10.1021/je3009073
6	1,2-dimethyl-3-propylimidazolium tetrafluoroborate	8	298.15 - 343.15	1.77841	0.33547	32489.2	435.717	0.0666624	10.1021/je800965t
7	1,2-dimethyl-3-propylimidazolium thiocyanate	8	288.15 - 323.15	2.13067	0.411471	41086.5	352.859	0.0230925	10.1021/acs.jced.7b01006
8	1,3-dimethylimidazolium dimethylphosphate	7	293.15 - 343.15	2.0826	0.396526	42473.9	356.189	0.0415667	10.1016/j.molliq.2018.04.064
9	1,3-dimethylimidazolium methylsulfate	8	298.15 - 333.15	2.75163	0.587754	38898.1	70.8177	0.0376737	10.1021/je500093z
10	1-(2-hydroxyethyl)pyridinium tricyanomethanide	12	293.15 - 348.15	1.99574	0.399453	49972	387.586	0.0478463	10.1016/j.fluid.2019.112304
11	1-(3-(trimethylammonio)propyl)pyridinium dicyanamide	11	283.15 - 333.15	1.99251	0.588782	43345.3	259.317	0.0203086	10.1039/C8RA04127J
12	1-(3-hydroxypropyl)pyridinium tricyanomethanide	12	293.15 - 348.15	1.96133	0.556239	45309.7	75.3967	0.00638208	10.1016/j.fluid.2019.112304
13	1-allyl-3-methyl-1H-imidazolium bis((trifluoromethyl)sulfonyl)amide	13	278.15 - 343.15	1.64439	0.563738	86008.4	247.61	0.0274468	10.1021/acs.jced.8b00537
14	1-butyl-1-methylpiperidinium dicyanamide	10	298.15 - 343.15	2.03667	0.487536	36300.5	251.148	0.0317899	10.1016/j.jct.2013.10.034
15	1-butyl-1-methylpiperidinium thiocyanate	4	318.15 - 348.15	2.07721	0.471374	48139.8	345.157	0.012694	10.1007/s10953-012-9875-7
16	1-butyl-1-methylpyrrolidinium bis[(trifluoromethyl)sulfonyl]imide	16	288.15 - 363.15	1.20645	0.530793	93480.3	165.387	0.0228559	10.1021/acs.jpcb.7b07433
17	1-butyl-1-methylpyrrolidinium dicyanamide	13	273.15 - 333.15	2.56093	0.580462	58367.3	335.929	0.0389383	10.1016/j.jct.2015.08.014
18	1-butyl-1-methylpyrrolidinium thiocyanate	6	298.15 - 348.15	1.99406	0.42073	33089.2	267.202	0.0398792	10.1007/s10953-012-9875-7
19	1-butyl-2,3-dimethylimidazolium tetrafluoroborate	7	298.15 - 353.15	0.728324	0.156413	97053.9	1084.09	0.0737634	10.1021/je3007474
20	1-butyl-2,3-dimethylimidazolium thiocyanate	8	288.15 - 323.15	1.87382	0.39162	35372.7	317.282	0.0271362	10.1021/acs.jced.7b01006
21	1-butyl-3-methylimidazolium acetate	13	273.15 - 363.15	2.67352	0.603432	53785.8	186.197	0.0441145	10.1021/acs.jced.9b01018
22	1-butyl-3-methylimidazolium bis(trifluoromethylsulfonyl)imide	28	283.15 - 363.15	0.731653	0.409942	73077.6	76.3889	0.0106727	10.1021/acs.jced.6b00178
23	1-butyl-3-methylimidazolium dicyanamide	13	283.15 - 343.15	2.1536	0.569372	51029.6	100.987	0.012177	10.1016/j.jct.2017.09.009
24	1-butyl-3-methylimidazolium hexafluorophosphate	17	283.15 - 363.15	2.32391	0.592746	24347.3	76.0394	0.0332381	10.1021/acs.jced.6b00178
25	1-butyl-3-methylimidazolium methyl sulfate	13	283.15 - 343.15	2.27748	0.517056	34702.8	229.563	0.0452475	10.1016/j.jct.2017.09.009
26	1-butyl-3-methylimidazolium nitrate	13	303.15 - 363.15	2.66997	0.518531	55824.6	334.003	0.0368915	10.1021/acs.jced.9b00415
27	1-butyl-3-methylimidazolium tetrachloroferrate	71	293.15 - 363.15	1.77935	0.578108	61563	141.385	0.0166698	10.1016/j.fluid.2013.03.001
28	1-butyl-3-methylimidazolium tetrafluoroborate	21	264.16 - 363.90	2.52908	0.53542	23664.2	131.754	0.110526	10.1016/j.jct.2016.04.008
29	1-butyl-3-methylimidazolium thiocyanate	17	283.15 - 363.15	2.73331	0.565081	190112	1023.1	0.0545629	10.1021/acs.jced.6b00178
30	1-butyl-3-methylimidazolium tricyanomethane	17	283.15 - 363.15	2.0698	0.525306	50308.3	246.862	0.0611718	10.1021/acs.jced.6b00178
31	1-butyl-3-methylimidazolium trifluoromethanesulfonate	17	283.15 - 363.15	2.19524	0.559122	52823.8	257.151	0.067802	10.1021/acs.jced.6b00178
32	1-butyl-4-methylpyridinium tetrafluoroborate	16	278.15 - 353.15	2.40907	0.607611	83221.5	217.426	0.0277852	10.1039/C3RA46339G
33	1-butyl-4-methylpyridinium thiocyanate	6	298.15 - 348.15	1.92291	0.409097	37082.4	296.755	0.0431149	10.1007/s10953-012-9875-7
34	1-butylpyridinium tetrafluoroborate	15	283.15 - 353.15	2.69095	0.552948	90117.3	505.431	0.0547254	10.1021/acs.jced.8b00334
35	1-butyronitrile-3-methylimidazolium tetrafluoroborate	8	288.15 - 323.15	1.86639	0.360781	49546.4	456.394	0.0257205	10.1021/acs.jced.7b00898
36	1-ethyl-1-methylpiperidinium ethyl sulfate	10	298.15 - 343.15	2.16672	0.509619	39537.1	261.688	0.0219263	10.1016/j.tca.2014.02.019
37	1-ethyl-1-methylpyrrolidinium ethyl sulfate	7	313.15 - 343.15	2.91931	0.670709	3535.76	12.8224	0.00862755	10.1016/j.tca.2014.02.019
38	1-ethyl-3-methylimidazolium acetate	14	298.15 - 363.15	2.86637	0.495557	37892.6	234.073	0.0509491	10.1021/acs.jced.6b00833
39	1-ethyl-3-methylimidazolium bis((trifluoromethyl)sulfonyl)imide	16	283.15 - 353.15	1.78667	0.536676	84492.5	396.063	0.0518169	10.1021/acs.jced.7b00221
40	1-ethyl-3-methylimidazolium dicyanamide	18	278.15 - 363.15	2.68335	0.477528	91439.3	604.095	0.0817736	10.1021/jp405913b
41	1-ethyl-3-methylimidazolium ethyl sulfate	20	278.15 - 373.15	2.63817	0.565296	50040.9	268.487	0.0853075	10.1016/j.jct.2018.01.025
42	1-ethyl-3-methylimidazolium methylsulfate	12	288.15 - 343.15	2.48319	0.466948	50559.8	380.312	0.0443739	10.1016/j.jct.2014.01.030
43	1-ethyl-3-methylimidazolium tetrafluoroborate	18	278.15 - 363.15	3.0786	0.536267	64677.9	353.869	0.0672239	10.1021/jp405913b
44	1-ethyl-3-methylimidazolium thiocyanate	17	283.15 - 363.15	3.18383	0.531766	127390	777.515	0.0606557	10.1021/acs.iecr.8b00506
45	1-ethyl-3-methylimidazolium trifluoroacetate	8	278.15 - 348.15	2.63943	0.510443	53371.6	328.062	0.0724918	10.1021/je0602824
46	1-ethyl-3-methylimidazolium trifluoromethanesulfonate	10	288.15 - 333.15	2.16386	0.445808	39755.4	291.805	0.0334458	10.1016/j.jct.2017.12.019
47	1-ethylpyridinium dicyanamide	7	288.15 - 318.15	2.86649	0.481987	18247.4	137.056	0.0174487	10.1016/j.molliq.2016.03.005
48	1-ethylpyridinium ethyl sulfate	10	298.15 - 343.15	1.95156	0.391574	46625.7	394.006	0.0316392	10.1021/je800981d
49	1-ethylpyridinium triflate	19	293.15 - 338.15	2.14641	0.428924	59212.9	448.633	0.0325031	10.1016/j.jct.2016.08.038
50	1-hexyl-1-methylpyrrolidinium bis(trifluoromethanesulfonyl)imide	15	288.20 - 363.20	1.16131	0.543555	60052.7	126.207	0.027342	10.1021/acs.iecr.6b00375
51	1-hexyl-3-methylimidazolium bis[(trifluoromethyl)sulfonyl]imide	39	273.15 - 363.15	0.626593	0.401462	66037	66.5272	0.0211627	10.1021/je501118w
52	1-hexyl-3-methylimidazolium chloride	13	303.22 - 363.17	2.35116	0.514868	51360.9	299.817	0.0354896	10.1016/j.fluid.2017.08.022
53	1-hexyl-3-methylimidazolium tetrafluoroborate	12	273.15 - 363.15	2.09839	0.521858	67506.5	393.886	0.102995	10.1021/acs.jpcb.6b10341
54	1-methyl-1-(3-(trimethylammonio)propyl)piperidinium dicyanamide	11	283.15 - 333.15	1.57589	0.621286	66973.3	122.832	0.00293867	10.1039/C8RA04127J
55	1-methyl-3-octylimidazolium chloride	10	283.15 - 363.15	2.0313	0.524331	39117.7	216.345	0.0857306	10.1016/j.molliq.2017.10.069
56	1-methyl-3-octylimidazolium tetrafluoroborate	17	283.15 - 363.15	1.77439	0.578513	87509.4	226.01	0.0338971	10.1021/je700521t
57	1-methylimidazolium acetate	16	283.15 - 353.15	3.57252	0.594412	31360.4	114.754	0.0343457	10.1021/acs.jced.6b00269
58	1-propylpyridinium tetrafluoroborate	25	278.15 - 338.15	2.92078	0.537075	27754.9	171.691	0.0424778	10.1016/j.jct.2011.08.015
59	2-ethyl-1,1,3,3-tetramethylguanidinium bis(trifluoromethanesulfonyl)imide	7	293.15 - 323.15	1.55231	0.559487	55624.3	217.744	0.0130074	10.1021/acs.jced.5b00259
60	2-ethyl-1,1,3,3-tetramethylguanidinium ethyl sulfate	7	293.15 - 323.15	2.00025	0.509382	33298.4	213.931	0.0144834	10.1021/acs.jced.5b00259
61	2-hydroxyethylammonium lactate	8	293.15 - 363.15	2.52638	0.51132	71664	82.4707	0.0192862	10.1016/j.jct.2008.11.003
62	2-octylisoquinolinium bis((trifluoromethyl)sulfonyl)amide	9	298.15 - 338.15	1.1858	0.577065	73329.6	230.854	0.0117506	10.1016/j.jct.2011.12.003
63	3-(2-amino-2-oxoethyl)-1-vinylimidazolium bis(trifluoromethylsulfonyl)amide	8	298.15 - 333.15	1.38354	0.48731	64303.9	210.51	0.0246984	10.1021/acs.jced.9b00648
64	3-(3-cyanopropyl)-1-methylimidazolium trifluoromethanesulfonate	8	288.15 - 323.15	2.41284	0.554768	21957.4	128.677	0.0186968	10.1016/j.molliq.2018.07.077
65	3-hexyl-1-methyl-1H-imidazolium bromide	16	288.70 - 360.63	2.01977	0.560344	125154	247.226	0.0154706	10.1016/j.jct.2017.11.012
66	N-(bis(dimethylamino)methylene)-N-ethylethanaminium bis((trifluoromethyl)sulfonyl)amide	7	293.15 - 323.15	1.4224	0.544527	48549.4	227.06	0.0087748	10.1016/j.jct.2019.04.023
67	N-ethylpiperazinium propionate	4	298.15 - 313.15	1.89441	0.406017	54481.4	341.599	0.00985429	10.1021/je201116t
68	benzyldimethyldodecylammonium bis(trifluoromethylsulfonyl)imide	12	293.15 - 348.15	0.954432	0.548381	46716.5	191.703	0.0348946	10.1016/j.fluid.2019.112304
69	butylammonium acetate	9	293.15 - 333.15	2.60281	0.397703	46141.7	354.544	0.0297625	10.1021/acs.jced.8b00583
70	butylammonium formate	9	293.15 - 333.15	2.57901	0.495633	88181.3	130.243	0.008033	10.1021/acs.jced.8b00583
71	butyltriethylphosphonium 2-cyanopyrrolide	4	293.15 - 313.15	1.99036	0.638109	59478.6	189.624	0.01305	10.1021/acs.jced.9b00769
72	butyltrimethylammonium bis(trifluoromethylsulfonyl)imide	20	278.15 - 373.15	1.01387	0.477413	63318.8	81.3123	0.0232825	10.1016/j.jct.2018.01.025
73	choline bis(trifluoromethylsulfonyl)imide	14	313.15 - 363.15	1.31641	0.510586	73078.2	107.453	0.0089738	10.1021/acs.jced.6b00021
74	diethylammonium acetate	7	293.15 - 323.15	2.74001	0.528583	57412.3	135.448	0.026726	10.1016/j.jct.2020.106093
75	diethylammonium hydrogen sulfate	13	293.15 - 353.15	4.35183	0.59012	22341.1	132.507	0.041817	10.1021/acs.jced.8b00725
76	dodecyltriethylphosphonium 2-cyanopyrrolide	4	293.15 - 313.15	1.23269	0.584705	55749.2	215.572	0.00544551	10.1021/acs.jced.9b00769
77	ethylammonium nitrate	6	293.15 - 318.15	3.03564	0.452033	103405	154.965	0.01994	10.1007/s10953-014-0283-z
78	n-butylammonium nitrate	5	293.15 - 313.15	2.56129	0.507854	89992.1	108.537	0.000999142	10.1016/j.jct.2012.10.008
79	tributyl(dodecyl)phosphonium 2-cyanopyrrolide	4	293.15 - 323.15	0.9747	0.606979	80288.9	236.384	0.0381811	10.1021/acs.jced.9b00769
80	triethylammonium acetate	13	293.15 - 353.15	2.48186	0.470139	37124.9	184.001	0.0639946	10.1021/acs.jced.8b00725
81	triethylammonium dihydrogen phosphate	4	338.15 - 353.15	3.2725	0.658871	63191.2	64.5177	0.0194046	10.1021/acs.jced.8b00725
82	triethylammonium hydrogen sulfate	3	298.15 - 308.15	3.02667	0.536465	28590	346.409	0.00171151	10.1016/j.tca.2013.02.002
83	triethylsulfonium bis((trifluoromethyl)sulfonyl)imide	14	278.15 - 343.15	1.6097	0.496345	42483.4	251.199	0.0562335	10.1021/acs.jced.8b00537
84	trihexyl(tetradecyl)phosphonium chloride	9	290.15 - 323.15	0.781656	0.570134	84906.4	258.619	0.0114444	10.1016/j.jct.2015.09.030
85	trimethylammonium acetate	4	298.15 - 313.15	2.73785	0.343221	33576.8	262.214	0.0130301	10.1016/j.jct.2012.11.014
86	trimethylammonium dihydrogen phosphate	4	298.15 - 313.15	2.56434	0.50614	23101.6	19.1564	0.00254813	10.1016/j.jct.2012.11.014
87	trimethylammonium hydrogen sulfate	4	298.15 - 313.15	5.13638	0.615818	99345.9	485.016	0.0702554	10.1016/j.jct.2012.11.014
	Total:							0.036417

## Sheet: Table S2.A
No.	Binary System	Tref. (K)	μPure IL, T_ref. (Pa.s)	Adjusted Parameters
				Current study													Grunberg & Nissan			Fang & He			Jouyban–Acree				Eyring–MTSM
				Extrapolation Mode						Interpolation Mode
				m	b8	b6	b3	b1		α	m	b8	b6	b3	b1		da	db		wa	wb		A0	A1	A2				τ12	τ21
1	Water + 1-ethylpyridinium triflate	298.15	0.0606	0.0137772	2.38081	-2.78751	1.33526	0.403798		5.29614	0.0116743	2.42492	-2.8464	1.32814	0.336291		1.04014	0.00618428		-1.44227e+07	39607.5		990.815	765.023	-1293.43		-38.0886	22583.1	6798.56	1941.71
2	Water + butylammonium acetate	298.15	0.546	0.0154393	2.35019	-2.01725	1.39345	0.687668		5.33161	0.0137317	2.16371	-2.10889	1.42769	0.565785		10.493	-0.0185459		-1.75832e+07	49211.8		1481.14	1266.81	137996		-44.7358	24149.9	5878.08	961.492
3	Water + 1-butyl-1-methylpyrrolidinium dicyanamide	298.15	0.0347	0.0120425	0.7873	-0.430858	0.180445	0.254834		6.51232	0.00775029	0.353258	-0.0732798	0.0943766	0.198139		5.95127	-0.00726323		465348	6067.05		1381.21	1491.06	5.48148e+11		-69.6576	32736.6	7001.45	-22.0697
4	Water + 1-ethyl-1-methylpiperidinium ethyl sulfate	298.15	1.821	0.0161727	5.13635	-4.55056	1.80443	1.18174		5.1768	0.015315	3.77631	-3.19287	1.3866	1.14686		3.44648	0.000889814		-3.87647e+07	98522.9		1298.92	1569.9	-1197.55		-13.9261	9130.93	5310.49	-1071.42
5	Water + 1-butyl-1-methylpiperidinium dicyanamide	298.15	0.123	0.0148516	-0.592937	1.29883	-0.120707	0.548093		4.99454	0.0145224	-0.591564	1.28602	-0.12202	0.550804		7.75535	-0.009682		-9.27337e+06	30128.6		1430.26	1583.68	-1330.44		-79.1904	37258	7132.51	166.724
6	Water + 1-butyl-4-methylpyridinium thiocyanate	298.15	0.086	0.0158299	2.75831	-2.77137	1.07515	0.459255		4.17904	0.0212096	2.37546	-1.96944	0.918043	0.603564		4.18042	-0.00259151		-1.36296e+07	38955.4		1116.65	1084.87	-1434.58		-29.5372	15803.6	5967.36	321.09
7	Water + 1,2-dimethyl-3-propylimidazolium tetrafluoroborate	298.15	0.377	0.0158207	1.10517	-0.557383	0.550939	1.21594		4.80232	0.0162511	1.11791	-0.525679	0.576329	1.24506		-1.44903	0.0115127		-3.5367e+07	86604.4		652.96	911.68	-1.75011e+06		3.2982	30.3042	3313.95	-2857.3
8	Water + 1-ethyl-3-methylimidazolium thiocyanate	298.15	0.02268	0.015554	0.5636	-0.315939	0.315557	0.356535		6.93277	0.00798197	0.34357	-0.216678	0.217037	0.236944		0.820389	0.00586505		-1.19083e+07	37545.8		780.069	718.791	-1324.89		1.4048	1885.38	4040.56	-218.15
9	Water + 3-hexyl-1-methyl-1H-imidazolium bromide	293.15	6.936	0.0144221	8.75228	-8.93667	3.75157	1.54322		4.95876	0.0164127	8.40783	-8.63294	3.64121	1.50789		6.98366	-0.0119164		-4.68435e+07	114691		1041.2	1463.59	-1319.23		-6.49889	5459.06	5063.04	-1369.87
10	Water + 1-ethyl-3-methylimidazolium dicyanamide	298.15	0.01454	0.0139832	0.595455	-0.347878	0.244712	0.262205		6.63146	0.008112	0.562021	-0.45835	0.249728	0.17269		2.8632	-0.000422682		-4.87961e+06	18302.6		783.786	736.412	1804.69		-2.37538	3159.22	4231.15	-362.969
11	Water + 1-butyl-3-methylimidazolium tricyanomethane	298.15	0.02732	0.0158404	-10.9038	6.78885	-0.767464	0.478351		2.59138	0.0658433	16.7181	-6.27734	0.613988	0.787269		1.5492	0.00176175		-1.11042e+07	34644.9		945.106	1289.75	362.101		-39.558	20213.5	7487.14	-867.336
12	Water + 1H-imidazolium octanoate	298.15	0.0713	0.016294	-4.89655	5.71232	-1.47434	0.501316		3.91312	0.0237935	-4.45036	5.70309	-1.65099	0.632273		14.0853	-0.0302267		-	-		1691.73	2480.05	-1329.22		-12.263	8422.74	4647.6	-2014.19
13	Water + 1-butyl-3-methylimidazolium trifluoromethanesulfonate	303.15	0.0632	0.0142407	-0.174408	0.937108	-0.373919	0.630223		4.6201	0.0162185	-0.196185	0.964944	-0.310189	0.645569		3.06996	-9.6395e-08		-1.25361e+07	36811.1		1151.66	1559.88	-1251.52		-10.7652	7367.51	5427.8	-1767.86
14	Water + 1-ethyl-1-methylpyrrolidinium ethyl sulfate	313.15	0.078	0.0128998	2.66889	-2.35083	0.940079	0.346057		5.96261	0.00971957	1.25376	-0.90257	0.501381	0.305362		11.2687	-0.0203717		3.67241e+06	-9833.87		1519.43	1459.45	-279.777		-49.1243	23515.6	5607.7	257.459
15	Water + 1-ethyl-3-methylimidazolium tetrafluoroborate	298.15	0.0369	0.0148146	-2.13503	2.74744	-0.586677	0.833336		4.88399	0.01401	-2.24677	2.8023	-0.538463	0.811154		-4.73382	0.0194922		-2.54986e+07	66655.1		290.767	485.338	-1304.76		16.2034	34170	13500.4	1167.49
16	Water + 1-butyl-3-methylimidazolium thiocyanate	298.15	0.05174	0.0150891	0.909069	-0.503544	0.358102	0.456988		4.43371	0.0180449	0.856087	-0.374421	0.444592	0.489668		1.59475	0.00528414		-1.29402e+07	38887.1		1038.37	960.045	-1346.55		-12.8641	8695.76	5250.58	170.603
17	Water + 2-hydroxyethylammonium lactate	303.15	11.3	0.0144093	2.73897	-0.536118	2.72284	1.10165		6.2392	0.0123866	2.11922	-1.41985	2.02442	0.852221		19.6697	-0.0446339		-3.41356e+07	84977.5		1850.72	877.43	-1238.01		-21.7194	10963	2878.14	340.6
18	Water + 1,1,3,3-tetramethylguanidinium lactate	303.15	13.7	0.0179998	6.19011	-4.32292	2.84358	1.2529		5.99968	0.0153442	2.91437	-1.91004	1.61236	1.07938		17.35	-0.0373143		-5.85865e+07	159209		1889.98	1688.9	1163.8		-42.0511	20121.2	4725.89	-21.2139
19	Water + 1-butyl-3-methylimidazolium tetrafluoroborate	298.15	0.1014	0.0137719	39.0812	-9.60524	0.673736	0.84982		2.52478	0.0525653	-483.526	75.3686	3.11323	1.69611		-3.68392	0.0163285		-3.37128e+07	88996.8		586.437	284.806	-2981.01		-55.2711	48979.8	11481	760.527
20	Water + ethylammonium nitrate	298.15	0.03449	0.012079	-3.06234	4.59251	-1.8764	1.31792		4.99823	0.0122142	-3.05577	4.57513	-1.84015	1.26641		-4.2974	0.0129461		-1.34234e+07	22297.3		-221.187	527.678	-7.94124		43.0717	-8082.1	14736.2	-2718.08
21	Water + 1-butyl-3-methylimidazolium dicyanamide	298.15	0.0318	0.0145489	-20.0588	4.28061	1.24341	0.236762		2.8175	0.0479077	-2.89737	-2.02253	3.23417	0.346291		3.385	-0.00243196		-1.02134e+07	30861.4		760.392	-366.907	-946.531		1.65293	328.113	-148.95	458.46
22	Water + 1-butyl-1-methylpyrrolidinium thiocyanate	298.15	0.109	0.0135565	2.29571	-2.02125	0.966485	0.393163		4.8861	0.0141782	2.00583	-1.72003	0.967914	0.400797		7.2007	-0.00899305		-3.19822e+06	8196.06		1327.69	1143.82	-1255.55		-34.4086	17121.8	5238.84	405.74
23	Water + 1-butylpyridinium tetrafluoroborate	293.15	0.221	0.0175165	-0.454705	0.769845	0.400791	1.29813		5.825	0.0134075	-0.564405	0.803242	0.195677	1.05111		0.679211	-0.000739968		-3.24893e+07	69866.8		108.173	114.521	-1355.45		7.23016	-520.847	7227.58	2512.28
24	Water + 1-methylimidazolium acetate	298.15	0.00693	0.0185102	0.916571	-0.358573	0.0683372	-0.125742		4.62052	0.0219749	0.933572	-0.351856	0.0748942	-0.13321		16.8989	-0.0391831		2.25464e+07	-45076.1		1444.73	1681.94	-1312.91		-11.7671	5646.47	2684.44	-2375.61
25	Water + 1,1,3,3-tetramethylguanidinium imidazol-1-ide	298.15	0.00729	0.0211479	0.510449	-0.117592	0.29915	-0.279451		4.56827	0.0261772	0.628295	-0.213972	0.334118	-0.300852		24.0509	-0.0597019		3.46601e+07	-81359.4		1698.5	1665.41	-1294.49		-78.3766	30103.2	4628.88	-155.405
26	Water + 1-propylpyridinium tetrafluoroborate	293.15	0.16	0.0171569	-0.211107	0.435648	0.397208	1.2056		5.06783	0.0165136	-0.235785	0.25998	0.586406	1.07624		-1.17429	0.00537974		-2.43268e+07	46361.1		116.25	84.3315	-1489.86		-0.937045	442.698	2276.77	-1966.23
27	Water + 1-ethyl-3-methylimidazolium acetate	298.15	0.1329	0.0171366	2.16687	-1.53687	0.577299	0.349599		4.69022	0.0183702	2.25033	-1.57245	0.666795	0.342493		10.313	-0.0168099		-5.56846e+06	27103.2		1737.14	1602.76	-1283.87		-41.7873	20617.8	5313.36	-166.377
28	Water + 1-ethyl-3-methylimidazolium trifluoromethanesulfonate	298.15	0.041	0.0121788	-0.358747	0.843086	-0.200016	0.560883		1.9016	0.114474	0.431919	1.53701	0.233028	1.55842		-2.75066	0.0182335		-2.28901e+07	72639.2		1015.06	1699.53	-1343.46		-17.456	27843.8	10065.1	-293.021
29	Water + 1-ethyl-3-methylimidazolium trifluoroacetate	298.15	0.032	0.0131801	0.860917	-0.859686	0.465017	0.263244		2.63867	0.0499886	0.409624	-0.00663667	0.631606	0.5011		3.59841	2.28136e-05		-1.4013e+07	51678.2		1214.3	1450.28	-1052.73		-37.3471	27160.1	8335.02	-81.9368
30	Water + n-butylammonium nitrate	298.15	0.09	0.0141054	0.141652	-0.00401901	0.561275	0.753079		5.38418	0.0119838	0.145918	-0.00361827	0.453729	0.672209		-0.806165	0.00952612		-2.18431e+07	54908.9		583.4	492.604	-63411.1		2.8036	2116.03	5035.95	691.814
31	Water + 1-methyl-3-octylimidazolium chloride	298.15	20.9	0.0152004	18.2278	-16.4935	2.70388	1.63378		5.02281	0.0147128	14.3857	-12.5531	1.71633	1.80705		-19.1266	0.0711397		-9.3862e+07	270080		2030.9	4746.28	-2448.67		-4.43591	5360.67	3988.52	-4012.9
32	Water + 1-hexyl-3-methylimidazolium chloride	298.15	18.1	0.01556	9.18809	-7.5723	2.7625	2.24799		5.48925	0.0139255	8.04944	-7.62315	2.86771	1.79492		-7.16083	0.0309117		-6.69504e+07	171797		1065.55	1795.6	-1320.17		2.98474	887.161	3345.08	-3060.55
33	Water + 1,3-dimethylimidazolium methylsulfate	298.15	0.0777	0.0147653	1.38844	-1.07161	0.657357	0.524199		4.86954	0.0146547	1.38562	-1.04652	0.638162	0.526451		2.05154	0.00279753		-1.73016e+07	49786.5		1016.91	875.381	-1307.33		-1.48913	3997.7	4475.64	54.9541
34	Water + 1-butyl-3-methylimidazolium acetate	303.15	0.4	0.0173664	0.783601	-0.00477241	0.6886	0.471518		4.03564	0.0234712	0.995747	-3.80426e-05	1.02144	0.566746		11.893	-0.0197052		-1.33918e+07	44659.9		1866.49	1800.79	-1307.17		-39.9388	19642.7	4633.61	-18.1328
35	Water + 1-butyl-3-methylimidazolium methyl sulfate	298.15	0.182	0.0157127	2.47156	-2.45414	1.47298	0.342644		4.9282	0.015132	2.44795	-2.50874	1.57211	0.304375		3.13738	0.00543603		-1.56013e+07	46713.2		1563.38	984.043	-1298.51		-94.6905	44253.9	6105.85	2096.58
36	Water + 1-butyl-4-methylpyridinium tetrafluoroborate	298.15	0.201	0.0192701	5.734	-0.56063	-4.83277	4.30683		4.66957	0.0208333	5.41631	-0.606294	-4.50221	4.36084		-52.8991	0.147857		-1.12571e+08	263862		-2017.75	838.251	-976.088		-3.3611	2.33696	-8425.77	105.926
37	Water + 1-hexyl-3-methylimidazolium tetrafluoroborate	298.15	0.191	0.0168153	4.03053	-2.69191	0.54652	0.955358		4.72542	0.0174116	4.56105	-2.68856	0.423836	1.01149		0.424306	0.00713505		-3.70149e+07	98915.6		757.681	1138.14	-1320.13		-13.5339	8890.23	6771.39	-1524.8
38	Water + 1-ethyl-3-methylimidazolium ethyl sulfate	298.15	0.0976	0.0152374	2.10339	-1.93577	0.837748	0.494007		4.96698	0.0145308	1.89921	-1.70691	0.798128	0.48047		4.56234	-0.00211455		-2.03141e+07	60354.7		1162.73	1156.27	20618.4		-34.2429	18307.1	6101.15	422.843
39	Water + (3-aminopropyl)tributylphosphonium L-leucinate	298.15	1.228	0.0161218	3.22297	-1.78607	0.545442	0.212797		6.28632	0.012066	3.41225	-2.05323	0.509095	0.16873		22.4861	-0.0483647		2.5121e+06	6596.33		2973.22	3165.18	-1311.04		-17.8837	9550.58	2481.71	-2833.08
40	Water + (3-aminopropyl)tributylphosphonium L-valinate	298.15	1.228	0.0161218	3.22297	-1.78607	0.545442	0.212797		6.31137	0.0120158	3.42823	-2.07023	0.509693	0.167864		22.4861	-0.0483647		2.89095e+06	5660.69		2973.22	3165.18	-1311.04		-17.8837	9550.58	2481.71	-2833.08
41	Water + (3-aminopropyl)tributylphosphonium L-alaninate	298.15	0.805	0.0155897	3.31876	-1.68382	0.260047	0.237951		5.83573	0.0129544	3.06455	-1.56463	0.238404	0.211516		19.6196	-0.0407907		6.43723e+06	-4581.07		2889.1	3223.18	1.81902e+06		-47.2116	22034.1	4216.86	-1657.89
42	Water + 1-butyl-1-methylpiperidinium thiocyanate	318.15	0.265	0.0156111	2.39475	-1.94867	1.08859	0.814835		5.24346	0.01406	1.89663	-1.52288	0.922879	0.750215		6.26441	-0.00701906		-2.57902e+07	62078.1		1270.66	1233.39	-1241.76		-18.8189	11081.5	5374.92	-418.114
43	Methanol + N-(bis(dimethylamino)methylene)-N-ethylethanaminium bis((trifluoromethyl)sulfonyl)amide	298.15	0.065	0.0143522	-0.665107	1.42616	0.203012	0.560758		4.56991	0.0158432	-0.731185	1.55256	0.248211	0.591388		2.25912	0.00482883		-7.87072e+06	22185.9		1180.58	690.658	-1313.58		-0.231498	1412.42	1632.29	-1635.77
44	Methanol + 1-butyl-1-methylpyrrolidinium bis[(trifluoromethyl)sulfonyl]imide	298.15	0.0681	0.0163067	0.0333481	1.77177	-0.851183	0.87296		3.67527	0.0262867	0.936048	1.71319	-0.912184	1.16156		3.19376	-0.000826064		-1.06064e+07	31745.5		1054.36	1345.6	-1285.34		1.53129	955.114	2714.62	-2714.55
45	Methanol + N,N-dimethyl-N-(3-sulfopropyl)cyclohexanaminium 4-methylbenzenesulfonate	303.15	113.733	0.0123329	23.5548	-27.4102	17.402	-2.14489		5.21997	0.0118629	21.8894	-27.7178	17.5369	-2.3298		26.1273	-0.0445169		-	-		2119.54	2013.6	-1259.24		-8.0728	7977.38	3521.63	-494.151
46	Methanol + 1-methyl-1-(3-(trimethylammonio)propyl)piperidinium dicyanamide	293.15	4.503	0.0144561	2.25685	-1.76536	3.37489	0.788753		4.1969	0.0166856	2.06745	-1.60616	4.57182	0.84609		8.97875	-0.00783676		-2.76957e+07	79650.3		2039.61	650.381	-1270.23		-64.4933	35403.9	5172.22	2532.2
47	Methanol + 1-(3-(trimethylammonio)propyl)pyridinium dicyanamide	293.15	2.191	0.017008	0.394992	1.88972	0.0155908	1.57093		2.99687	0.032054	-1.70561	9.56939	-0.102269	2.97964		1.47208	0.00998855		-3.43282e+07	103568		1481.07	1878.79	-1293.89		11.5187	-402.686	3835.84	-1857.48
48	Methanol + 1-ethyl-3-methylimidazolium tetrafluoroborate	298.15	0.041	0.0152364	0.786274	-0.816099	0.689259	0.82265		4.13646	0.019172	1.02145	-1.0689	0.990232	0.947432		-3.6887	0.0153387		-1.63624e+07	43920.2		266.361	263.897	13549		3.21395	-728.533	891.289	-3139.81
49	Methanol + 1,3-dimethylimidazolium dimethylphosphate	298.15	0.291	0.0170888	1.5159	-1.132	1.44885	0.841066		3.31956	0.0298204	2.51954	-0.919688	2.59733	1.2906		1.03625	0.00833387		-2.47248e+07	75386.1		1114.07	612.832	-1202.04		5.78625	2495.03	4036.76	1138.81
50	Methanol + 1-butyl-3-methylimidazolium tetrafluoroborate	298.15	0.105	0.0170926	0.933336	-0.931626	1.00291	1.00055		3.76025	0.0254893	0.687997	-0.359314	1.41099	1.3313		-3.29691	0.0154482		-2.38076e+07	64312.1		332.717	304.158	1019.64		6.83549	-1359.65	3009.84	-896.1
51	Methanol + 1-ethyl-3-methylimidazolium ethyl sulfate	298.15	0.0962	0.0155586	6.64638	-6.92632	2.20824	0.691319		2.99888	0.0362322	4.87786	-4.20513	2.86377	1.33896		-1.16376	0.0121684		-2.00236e+07	57465.9		753.5	558.673	-1342.98		11.7642	-600.138	4472.84	871.288
52	Methanol + 1-ethyl-3-methylimidazolium bis((trifluoromethyl)sulfonyl)imide	298.15	0.03249	0.0136505	0.485327	-0.173133	0.418372	0.508472		4.54589	0.0150987	0.522385	-0.143986	0.431723	0.551026		5.17689	-0.00706762		-6.99054e+06	20260.2		886.785	738.017	-1556.57		-11.7258	6909.04	4598.48	130.403
53	Methanol + 1-butyl-3-methylimidazolium bis(trifluoromethylsulfonyl)imide	298.15	0.0496	0.0149763	3.09606	-2.40905	0.924696	0.322582		4.45101	0.0175271	3.06732	-2.26792	0.945324	0.375761		10.1402	-0.0198727		-1.98922e+06	8305.38		1353.24	958.618	-414177		-7.13002	4258.35	2370.24	-1051.51
54	Methanol + trihexyl(tetradecyl)phosphonium chloride	298.15	1.683	0.0138856	8.95763	-8.33984	3.2729	0.200723		4.74232	0.0146708	9.10135	-8.15669	3.05805	0.286572		26.3333	-0.0594463		-1.41608e+07	44214.4		2791.19	2487.98	59586.4		-35.1536	20411.6	4277.07	197.947
55	Methanol + 1-propylpyridinium tetrafluoroborate	293.15	0.16	0.0171589	2.52196	-1.51224	0.186174	1.0452		6.60825	0.0109253	1.56274	-1.12394	0.208701	0.740132		5.35323	-0.0116413		-2.16417e+06	-109.951		677.201	1057.5	-1227.69		-14.9715	5702.4	3072.22	-3127.12
56	Methanol + 1,1,3,3-tetramethylguanidinium imidazol-1-ide	298.15	0.00729	0.0211596	0.414512	-0.350185	0.483732	0.142065		2.95529	0.0656364	0.378668	-0.0461635	0.728835	0.246636		8.163	-0.0176401		-278814	5685.84		822.108	465.687	-1339.13		-24.6707	10501.3	4009.92	913.79
57	Methanol + 1-butyl-3-methylimidazolium thiocyanate	298.15	0.0517	0.0160797	-0.353997	0.831817	0.271691	0.7609		3.25012	0.0344824	0.256851	0.435934	1.18864	1.07496		0.0446483	0.00742263		-1.45644e+07	41633.2		666.586	439.876	-2.81219e+07		5.79132	-628.7	2710.32	-692.447
58	Methanol + n-butylammonium nitrate	298.15	0.09	0.0141054	-0.362324	0.59821	0.724449	0.798063		4.80719	0.014257	-0.32715	0.601047	0.706033	0.810925		2.93429	-0.0017377		-9.39666e+06	26579.9		692.842	300.077	-1218.32		1.70792	537.796	1869	-333.576
59	Methanol + 1-methyl-3-octylimidazolium chloride	298.15	21	0.0149526	2.25355	-2.64994	5.65893	2.45108		4.46232	0.0159013	2.68311	-2.74914	6.7164	2.81224		-13.8493	0.0489122		-6.50237e+07	173244		390.393	271.215	-1347.81		278.831	-75379.5	7829.59	4272.47
60	Methanol + N-ethylpiperazinium propionate	298.15	0.2435	0.0228211	0.545841	-0.0724549	1.29276	0.699163		3.49209	0.0366596	1.25276	0.027108	2.26937	0.982942		6.60461	-0.00805444		-2.47626e+07	77479.1		1233.27	468.356	-1270.92		-3.48019	4446.66	3045.56	1015.87
61	Methanol + 1-butyl-4-methylpyridinium tetrafluoroborate	298.15	0.196	0.0182034	0.294946	0.143463	0.603048	1.3273		4.424	0.0177636	0.445521	0.154277	0.668355	1.51345		-4.94918	0.0207121		-2.38142e+07	62189.2		443.012	329.2	-1177.56		-386.736	195084	6681.81	9906.21
62	Ethanol + N-(bis(dimethylamino)methylene)-N-ethylethanaminium bis((trifluoromethyl)sulfonyl)amide	298.15	0.065	0.0143522	-0.136253	0.657005	0.223871	0.56934		5.10798	0.0131963	-0.203979	0.677555	0.209758	0.533493		3.36094	-0.0022369		-6.36379e+06	17948.7		800.418	426.564	117883		1.96283	301.989	1544.78	-1547.37
63	Ethanol + 1-methyl-1-(3-(trimethylammonio)propyl)piperidinium dicyanamide	293.15	4.503	0.0144561	1.31907	-1.22945	2.88026	0.886918		4.15145	0.0169253	1.20049	-0.780725	3.75829	1.03864		3.59204	0.00596457		-2.34803e+07	71779.7		1663.62	673.381	-1312.96		-28.4453	25005.8	5917.63	2601.61
64	Ethanol + 1-(3-(trimethylammonio)propyl)pyridinium dicyanamide	293.15	2.191	0.017008	-3.45534	5.13656	-0.350716	1.4784		3.37815	0.0272792	-3.80079	7.46574	0.496284	2.1912		-0.535605	0.0141576		-2.34524e+07	71525.6		1219.23	1337.43	-22705.9		13.0872	-1066.18	3937.44	-1276.15
65	Ethanol + butylammonium acetate	298.15	0.765	0.0153195	0.404838	-0.18058	1.29415	1.32379		4.9002	0.0150458	0.505596	-0.3193	1.30777	1.30088		-4.60595	0.0203594		-2.01647e+07	58838.6		438.889	304.013	-1289.25		7.75751	-1824.58	1692.99	-1709.09
66	Ethanol + butylammonium formate	298.15	0.1436	0.014043	0.415997	-0.265378	0.794399	0.7774		5.33642	0.0119267	0.366221	-0.242022	0.6629	0.704611		0.236502	0.00586505		-7.99111e+06	26344.6		616.274	351.398	-1467.96		3.39808	633.371	3347.2	424.696
67	Ethanol + 1-ethyl-3-methylimidazolium acetate	298.15	0.139	0.0186815	1.24057	-1.60053	1.46114	0.655899		3.00244	0.0412533	0.491867	-0.429586	2.66763	1.1178		-0.00162377	0.00725927		-1.9622e+07	61836.7		683.834	115.352	22.0599		29.9068	-4368.88	4487.07	3113.91
68	Ethanol + 2-ethyl-1,1,3,3-tetramethylguanidinium ethyl sulfate	298.15	0.44	0.0184451	-0.406264	0.59082	1.00058	1.13755		3.69459	0.0269724	-0.233171	0.775464	1.83152	1.53968		-5.21727	0.0233201		-2.55829e+07	73870.2		531.348	294.865	-1204.71		10.2084	-2520.38	1353.53	-1516.78
69	Ethanol + 2-ethyl-1,1,3,3-tetramethylguanidinium bis(trifluoromethanesulfonyl)imide	298.15	0.0589	0.0155723	0.644112	-0.670418	0.83616	0.421815		4.76254	0.0160278	0.680233	-0.684497	0.851068	0.426551		4.76496	-0.00645652		-5.53066e+06	16471.9		842.166	387.208	11156.4		-15.9145	8709.66	4288.83	1536.06
70	Ethanol + 1-ethylpyridinium dicyanamide	298.15	0.0189	0.0136704	-0.643798	0.786153	0.095282	0.448395		4.58007	0.0149669	-0.857055	0.982978	0.129856	0.459393		-2.30412	0.0124496		-7.68568e+06	25026.3		404.026	267.915	-237709		11.2649	-1597.38	4404.89	869.809
71	Ethanol + 1,3-dimethylimidazolium dimethylphosphate	298.15	0.291	0.0170888	2.8057	-3.44488	2.34959	0.575853		3.69784	0.0252836	2.52053	-2.98537	3.13139	0.801405		-2.61514	0.0190986		-1.8605e+07	59240.1		966.394	222.427	87172.2		-2.87623	9906.3	4715.78	3785.64
72	Ethanol + 1H-imidazolium octanoate	298.15	0.0713	0.016294	0.561507	-0.240492	0.496616	0.50878		2.34551	0.0629686	1.1306	1.0272	1.27363	1.10772		-4.46356	0.0248535		-	-		974.426	710.352	-1422.57		25.4201	-4725.48	3965.06	213.08
73	Ethanol + 1-butyl-3-methylimidazolium thiocyanate	298.15	0.0517	0.0150849	-0.437613	0.708095	0.186478	0.720062		3.86466	0.0228368	-0.699454	1.07406	0.392686	0.884068		-0.556036	0.00710364		-1.104e+07	32242.7		451.238	273.246	-1339.77		12.3278	-2737.62	3551.85	195.037
74	Ethanol + 1,1,3,3-tetramethylguanidinium imidazol-1-ide	298.15	0.00729	0.0211596	0.196921	-0.292633	0.458835	0.125189		2.34212	0.133902	0.434966	-0.474116	1.0576	0.257129		3.95576	-0.00750211		-3.24065e+06	12803.9		488.968	76.4884	-1408.67		-0.876879	1134.31	1634.9	832.634
75	Ethanol + n-butylammonium nitrate	298.15	0.09	0.0141054	-0.432482	0.644343	0.454363	0.724497		5.08222	0.0130807	-0.419358	0.599515	0.426859	0.684341		0.524332	0.00470126		-6.86841e+06	23008.4		545.079	306.042	-1285.42		0.305284	1047.74	2753.47	-22.2842
76	Ethanol + 1-ethyl-3-methylimidazolium dicyanamide	298.15	0.0149	0.0121186	0.246161	-0.315447	0.434501	0.336149		4.37306	0.0149441	0.331045	-0.364026	0.485851	0.378001		-1.51381	0.00968336		-5.34731e+06	17791.5		482.492	241.754	-707.177		8.95271	-124.393	4913.44	1769.94
77	Ethanol + 1-ethyl-3-methylimidazolium bis((trifluoromethyl)sulfonyl)imide	298.15	0.03202	0.0139477	0.386457	-0.223918	0.37535	0.47526		4.59933	0.0161298	0.377957	-0.208705	0.458958	0.461367		2.51567	-0.00180826		-4.76068e+06	13559.8		573.024	399.366	-1315.13		1.30959	680.954	2841.91	-760.446
78	Ethanol + 1-butyl-3-methylimidazolium bis(trifluoromethylsulfonyl)imide	298.15	0.05122	0.0152379	-0.268752	0.779723	0.0628374	0.594339		4.55255	0.0172342	-0.4258	0.955625	0.133127	0.593993		2.17059	0.000981907		-6.21152e+06	17983.2		691.784	554.265	-1297.46		1.78392	256.052	1807.67	-2090.65
79	Ethanol + 1-butyl-3-methylimidazolium nitrate	298.15	0.159	0.0163403	3.82437	0.137413	-0.230182	1.15865		3.6024	0.0261513	6.16164	-0.0504839	0.00266722	1.60613		-6.76061	0.0253425		-2.01239e+07	57855.7		356.861	805.475	-1088.29		-29.441	32725.7	13682.5	-4309.34
80	Ethanol + N-ethylpiperazinium propionate	298.15	0.2435	0.0228211	0.0506468	0.048955	1.11181	0.808368		3.78242	0.0326899	0.294112	-0.0214711	1.7941	1.04206		1.38335	0.00345187		-1.89378e+07	57988		720.927	176.344	-1260.46		4.10031	-174.088	1480.14	194.046
81	Ethanol + 1-butyl-3-methylimidazolium tetrafluoroborate	298.15	0.0992	0.0167579	2.07268	-2.24995	0.911904	0.880072		4.45251	0.0184708	2.28138	-2.32604	0.92719	0.970575		-5.63049	0.0217817		-1.66644e+07	47175.8		297.674	608.679	-1357.17		180.959	-29162.4	12771.8	419.964
82	Ethanol + 1-hexyl-3-methylimidazolium tetrafluoroborate	298.15	0.191	0.0167425	-0.290565	0.723435	0.291983	1.12734		4.58768	0.0179747	-0.321244	0.74174	0.411893	1.17521		-4.23743	0.0174307		-1.94239e+07	53964.8		300.322	425.25	-963.653		-29.2272	17653.8	9320.04	1410.13
83	Ethanol + 1-methyl-3-octylimidazolium tetrafluoroborate	298.15	0.337	0.0163327	0.745125	-0.623304	1.00702	1.08117		4.69174	0.0166999	0.838531	-0.800823	1.20215	1.08001		-2.73055	0.014368		-1.83122e+07	49977.9		482.543	461.758	3404		7.9782	167.371	5027.34	716.569
84	Ethanol + 1,3-dimethylimidazolium methylsulfate	298.15	0.0777	0.0147653	0.557301	-0.719734	0.875078	0.686692		3.61199	0.024611	0.54458	-0.416888	1.21416	0.95888		-3.29558	0.0158076		-1.35597e+07	41021.4		516.011	239.283	-1209.99		24.986	7747.48	7095.46	4921.67
85	Ethanol + 1-butyl-3-methylimidazolium methyl sulfate	298.15	0.182	0.0157127	0.618116	-0.752457	1.24431	0.748117		3.94416	0.0212408	0.547603	-0.363036	1.50843	0.974134		-1.89231	0.013527		-1.46025e+07	42751.3		711.719	231.504	-1313.78		10.5407	-1043.1	3325	1359.23
86	Ethanol + 1-hexyl-3-methylimidazolium bis[(trifluoromethyl)sulfonyl]imide	298.15	0.07046	0.0169962	0.335744	0.0527702	0.401093	0.55822		4.47011	0.0196933	0.320169	0.143693	0.471034	0.580239		4.48301	-0.00521461		-6.54842e+06	19072.9		832.804	577.756	-1304.36		-1.84769	1756.03	2221.31	-1226.17
87	Ethanol + 1-methyl-3-octylimidazolium chloride	298.15	21	0.0149526	2.45515	-3.91614	5.76537	2.28361		4.74709	0.0151746	2.45617	-3.55905	5.58865	2.46374		-15.2189	0.0511005		-5.09875e+07	139971		171.867	246.407	-872.983		417.537	-124059	7263.32	4949.4
88	Ethanol + 1-ethylpyridinium ethyl sulfate	298.15	0.1263	0.0141517	0.283554	-0.241192	0.773224	0.825617		4.40858	0.0164427	0.228887	-0.0634873	0.809259	0.938495		-0.79802	0.0084803		-1.41539e+07	41022.8		543.675	323.107	-930.643		-7.90021	28940.1	8263.27	5293.53
89	Ethanol + 1-ethyl-3-methylimidazolium tetrafluoroborate	298.15	0.0369	0.0148365	-264.323	89.8418	-4.11164	0.947682		4.48096	0.016286	-261.517	89.3493	-4.03975	0.999015		-4.94766	0.0179949		-1.19615e+07	33730.3		270.856	680.236	-1495.11		904.999	-161000	18746.9	-3727.88
90	Propanol + 1-butyl-3-methylimidazolium bis(trifluoromethylsulfonyl)imide	298.15	0.05122	0.0148379	1.41501	-1.43709	0.584098	0.503121		5.47209	0.0123903	1.61514	-1.72252	0.643019	0.424136		0.978628	0.0010567		-4.36552e+06	11472.1		402.014	390.406	-1299.3		-288.612	109758	10584.6	1958.92
91	Propanol + 1-allyl-3-methyl-1H-imidazolium bis((trifluoromethyl)sulfonyl)amide	293.15	0.0418	0.0141153	0.25128	0.07543	-0.047024	0.584964		5.36257	0.0121249	0.143401	0.110153	0.0133456	0.513496		-1.23416	0.00709692		-5.72898e+06	15993.1		323.407	336.675	-1298.92		3.15221	-563.853	2463.34	-2381.19
92	Propanol + triethylsulfonium bis((trifluoromethyl)sulfonyl)imide	298.15	0.0324	0.0142976	0.619834	-0.470599	0.21753	0.463229		6.23943	0.00921076	0.577949	-0.549481	0.254246	0.339147		-0.672465	0.00577823		-5.12917e+06	14774		402.1	312.5	739113		2.40051	-216.739	2229.96	-1639.12
93	Propanol + 1-ethyl-3-methylimidazolium methylsulfate	298.15	0.00194	0.0175558	6.86062	-8.68961	3.44143	-1.43473		4.66696	0.0179577	6.81341	-8.55786	3.3217	-1.40785		28.3834	-0.0640872		2.32754e+07	-40584.8		3028.4	2014.66	168.417		-1688.17	626701	9562.38	2205.23
94	Propanol + 1,3-dimethylimidazolium methylsulfate	298.15	0.078	0.0160818	0.973558	-0.630164	0.372454	0.412468		5.93518	0.0121878	0.603786	-0.466972	0.352612	0.331139		11.9256	-0.0303796		7.38622e+06	-19891.4		843.639	704.555	-1365.78		-78.6673	29106.4	5642.72	630.265
95	Propanol + butylammonium formate	298.15	0.1436	0.014043	0.437305	-0.405748	0.678378	0.704746		6.54091	0.0089085	0.314348	-0.320197	0.422369	0.511907		-0.40375	0.00671331		-4.98119e+06	17827.4		479.196	281.817	16335.1		3.07266	684.899	3799.43	783.098
96	Propanol + 1-ethyl-3-methylimidazolium acetate	298.15	0.139	0.0174786	0.344641	-0.591347	0.951913	0.638702		3.04733	0.0399033	0.818574	-0.887727	2.10045	1.02365		-4.24295	0.0194674		-1.22901e+07	40152.4		595.894	228.403	-1293.81		21.931	-3866.76	4398	2098.98
97	Propanol + 2-ethyl-1,1,3,3-tetramethylguanidinium bis(trifluoromethanesulfonyl)imide	298.15	0.0589	0.0155723	-0.300765	0.531825	0.240335	0.477207		4.99595	0.0150231	-0.219023	0.437775	0.260906	0.454316		2.38681	-0.000992865		-3.46952e+06	10246.8		604.893	326.252	-1297.79		1.51776	213.33	1447.11	-1456.91
98	Propanol + 2-ethyl-1,1,3,3-tetramethylguanidinium ethyl sulfate	298.15	0.44	0.0184484	-0.0830313	0.118599	0.909048	1.06896		3.84328	0.025117	0.0247542	0.118279	1.54723	1.37553		-7.27653	0.0280605		-1.99262e+07	58213.4		396.102	176.114	-1349.71		22.7886	-5894.95	3133.13	937.683
99	Propanol + 1-ethylpyridinium dicyanamide	298.15	0.0189	0.0136704	-0.0641186	0.0434861	0.227306	0.361015		5.31472	0.0115422	-0.0851264	0.102889	0.161339	0.335999		-1.96844	0.00961974		-4.23639e+06	13795.8		246.214	105.78	-1558.58		5.75904	-1331.88	2210.95	-396.772
100	Propanol + 1,3-dimethylimidazolium dimethylphosphate	298.15	0.291	0.0170888	2.08952	-2.06652	1.37325	0.698673		3.40499	0.0290045	4.06581	-3.86622	2.72724	0.954242		-3.04779	0.0176719		-1.41128e+07	45991.2		730.155	190.982	-21913.5		16.4083	-2877.28	3053.85	1364.84
101	Propanol + 1-butyl-3-methylimidazolium thiocyanate	298.15	0.0517	0.0150952	-0.484183	0.735349	0.0183077	0.669288		4.29854	0.0185725	-0.412221	0.769151	0.0441482	0.76136		-3.34351	0.0141969		-9.03681e+06	26900.2		307.284	219.845	-1331.92		20.5247	-4991.47	4978.05	1244.28
102	Propanol + 1,1,3,3-tetramethylguanidinium imidazol-1-ide	298.15	0.00729	0.0211596	-0.0814137	0.0431587	0.226746	0.121087		2.41803	0.1195	-0.117959	0.0765055	0.540909	0.234783		0.661211	0.000909683		-2.54023e+06	9663.02		286.786	-18.8793	-1374.53		0.905411	8.18277	-32.74	33.0281
103	Propanol + n-butylammonium nitrate	298.15	0.09	0.0141054	-0.327561	0.487055	0.340001	0.641101		6.30172	0.00951661	-0.197111	0.281033	0.229842	0.482778		0.704357	0.0026026		-2.91432e+06	11762.7		437.113	225.846	-1338.07		-1124.13	401945	11725.1	3806.45
104	Propanol + 1-hexyl-3-methylimidazolium tetrafluoroborate	293.15	0.2327	0.0164507	0.830854	-0.812453	0.639633	1.06017		5.28451	0.0144576	0.980459	-0.878307	0.586427	0.955189		-3.70592	0.0133299		-1.13761e+07	29222.5		143.637	41.7923	-1182.58		90.7533	-25438.2	6358.2	5741.75
105	Propanol + N-ethylpiperazinium propionate	298.15	0.2435	0.0228211	-0.304581	0.415976	0.682864	0.886026		3.76517	0.0329153	-0.217548	0.480017	1.16361	1.16864		-2.10906	0.011675		-1.50581e+07	45531.4		403.274	84.9036	-1445.67		4.52998	-998.048	365.077	-998.681
106	Propanol + 1-methyl-3-octylimidazolium chloride	298.15	21	0.0149526	0.118722	-1.2037	4.25742	2.45131		5.1829	0.0142527	-0.308846	-0.236245	3.01632	2.39202		-18.17	0.0578873		-3.97022e+07	108122		-100.553	91.0866	1578.4		155078	-8.89135e+06	30616.3	7605.36
107	Propanol + 1-ethylpyridinium ethyl sulfate	298.15	0.1263	0.0141517	0.115381	-0.175549	0.645591	0.745371		4.68141	0.0149436	0.205018	-0.200449	0.656516	0.783183		-3.82372	0.0168143		-1.04409e+07	30931.6		476.367	171.955	-1299.26		22.2118	-3919.91	5017.58	2584.51
108	Propanol + 1-ethyl-3-methylimidazolium ethyl sulfate	298.15	0.0976	0.0152374	0.182762	-0.29731	0.695074	0.631733		4.6213	0.0162121	0.291893	-0.323067	0.714205	0.661425		-3.73282	0.0169351		-9.29989e+06	28353.7		476.692	193.897	-1189.65		15.2848	-3114.85	3553.36	1538.08
109	Butanol + benzyldimethyldodecylammonium bis(trifluoromethylsulfonyl)imide	298.15	1.425	0.0155453	4.23933	-4.24711	2.07688	0.850864		5.6457	0.0130236	4.02312	-4.48818	2.062	0.687495		2.91839	6.79713e-05		-6.46222e+06	15449.2		926.207	635.099	1.03967e+08		-246.167	101158	8133.43	3194.85
110	Butanol + 1-butyl-3-methylimidazolium bis(trifluoromethylsulfonyl)imide	298.15	0.05122	0.0148379	1.07495	-1.00447	0.396507	0.501607		5.61637	0.01209	1.23663	-1.2807	0.487283	0.403131		0.584442	0.00143711		-3.44581e+06	9073.03		333.933	283.889	-1328.56		-376.954	143899	11850.3	2116.96
111	Butanol + 1-butyl-3-methylimidazolium trifluoromethanesulfonate	298.15	0.082	0.0152543	-0.873757	1.20258	0.131681	0.615704		5.26448	0.0134614	-1.37425	1.57549	0.113973	0.544188		1.12633	-0.000109609		-5.37018e+06	15494.5		360.706	-181.661	-1329.25		1.53651	-168.206	-545.823	494.058
112	Butanol + 1-ethyl-3-methylimidazolium methylsulfate	298.15	0.0685	0.0150535	0.469111	-0.209027	0.295676	0.394409		6.68641	0.00992998	0.307543	-0.195296	0.232142	0.279055		9.43314	-0.0240872		5.34258e+06	-14409.9		672.256	556.971	-1291.46		-25.2517	9650.98	3996.05	-296.721
113	Butanol + 1,3-dimethylimidazolium methylsulfate	298.15	0.078	0.0160818	0.580617	-0.289771	0.324499	0.344682		8.01381	0.00794059	0.463409	-0.447484	0.287087	0.2014		10.6051	-0.0268724		6.9565e+06	-17842.9		821.894	688.246	-1346.21		-79.6107	29385.6	5589.59	857.033
114	Butanol + butylammonium formate	298.15	0.1436	0.014043	0.181062	-0.114928	0.43775	0.772265		6.21552	0.00974111	0.110231	-0.0597152	0.263826	0.591479		-1.93626	0.00982178		-4.93964e+06	17528		292.094	243.419	-1234.25		4.6462	-955.955	2504.29	-1386.59
115	Butanol + 1-butyl-3-methylimidazolium thiocyanate	298.15	0.0517	0.0150952	-0.131869	0.127357	0.268093	0.576274		4.11444	0.0202356	-0.239235	0.32215	0.339485	0.684752		-4.32121	0.016493		-8.01775e+06	24474.8		268.796	99.4258	-22593.1		15.0339	-3983.73	3284.49	1321.84
116	Butanol + 1-ethyl-3-methylimidazolium ethyl sulfate	298.15	0.0962	0.0155586	2.95892	-2.81831	0.747608	0.675899		4.37332	0.0185004	2.84267	-2.82897	0.976921	0.714199		-6.73758	0.0251197		-1.08797e+07	33699.8		313.572	306.841	4592.3		96.8527	-22945.4	8661.87	1792.28
117	Butanol + 1,1,3,3-tetramethylguanidinium imidazol-1-ide	298.15	0.00729	0.0211596	0.0704239	-0.218683	0.298442	0.0899494		3.11486	0.0544968	0.0596884	-0.246508	0.432697	0.150692		-1.01676	0.00523217		-3.01253e+06	10574		191.03	-91.6044	-1024.44		-860.477	361485	3506.84	16041.2
118	Butanol + 2-octylisoquinolinium bis((trifluoromethyl)sulfonyl)amide	298.15	0.369	0.0167207	-0.345022	0.33112	0.762591	0.746038		5.01823	0.0161938	-0.343682	0.3265	0.726537	0.730096		3.15237	-0.00278981		-5.99796e+06	15899.4		716.388	336.847	-1387.5		-78.4668	34702.9	6916.18	2624.54
119	Butanol + n-butylammonium nitrate	298.15	0.09	0.0141054	-0.551677	0.65782	0.219675	0.642277		5.39435	0.0121282	-0.671426	0.839523	0.0801709	0.58705		0.552683	0.00240038		-1.94289e+06	8675.19		339.519	269.255	-1166.02		-829.801	302145	12562.8	3240.01
120	Butanol + N-ethylpiperazinium propionate	298.15	0.2435	0.0228211	0.816552	-0.486478	0.376426	0.646868		10.2266	0.00890852	0.441673	-0.401188	0.199843	0.288988		14.9963	-0.0416803		1.27427e+07	-39720.9		680.612	705.836	-1658.03		-79.5896	26481.1	4408.61	-759.292
121	1,2-Propanediol + choline bis(trifluoromethylsulfonyl)imide	313.15	0.0564	0.0127761	-1.23842	1.66287	-0.683565	0.433775		8.96243	0.00543173	-0.846936	1.06544	-0.370614	0.235146		-7.67629	0.0232194		-6.28249e+06	16580.8		-7.56511	299.312	-1315.35		100.529	-31548.4	12337	-3081.78
122	1,2-Propanediol + butyltrimethylammonium bis(trifluoromethylsulfonyl)imide	323.15	0.0356	0.0125726	-0.889234	1.51277	-0.869721	0.528275		5.24847	0.0119689	-0.777769	1.38186	-0.764081	0.491652		-8.85278	0.0254545		-8.87908e+06	23161.7		-173.995	366.847	-1155.66		12785.4	-4.12942e+06	27971.1	-3991.73
123	1,4-Dioxane + 1-ethyl-3-methylimidazolium tetrafluoroborate	298.15	0.0415	0.0126635	2.16687	-1.2895	0.751632	0.404581		3.44511	0.0261256	2.52846	-0.847351	1.08001	0.585305		2.98918	-0.0029072		-856695	6197.89		669.716	185.546	-1216.12		1.04869	393.226	748.34	-599.974
124	Ethylene glycol + 1-ethyl-3-methylimidazolium tetrafluoroborate	298.15	0.0415	0.0126635	-0.579392	0.754462	-0.634768	0.63778		6.62727	0.00796374	-0.579276	0.739493	-0.460841	0.452764		-9.01265	0.0217204		-8.42558e+06	15963.8		-666.166	-203.731	-872.387		1.66191	-826.371	-1987.38	-3615.16
125	Ethylene glycol + 1-butyl-3-methylimidazolium tetrafluoroborate	293.15	0.137	0.0148906	0.208365	-0.261717	-0.33085	0.868648		4.59343	0.0174694	0.080471	-0.10479	-0.269864	0.914234		-9.12616	0.0226452		-9.51371e+06	18495		-586.336	-158.858	-1359.53		1.60998	-775.979	-2255.63	-3446.24
126	Ethyl Acetate + 1-butyl-3-methylimidazolium tetrachloroferrate	298.15	0.046	0.0142924	0.0120262	0.363199	0.600519	0.587565		3.36357	0.0283062	0.0155723	0.887799	1.0703	0.866914		3.57787	-0.00146027		-3.50262e+06	13517.8		929.281	487.722	2.99059e+07		1.17936	1327.51	2502.39	-231.852
127	Ethyl Acetate + 1-butyl-3-methylimidazolium trifluoromethanesulfonate	298.15	0.082	0.0152543	1.69986	0.486445	-0.373809	0.706473		4.49138	0.017809	1.79089	0.712226	-0.297733	0.740355		6.78837	-0.00921337		-334895	6522.32		1372.05	954.536	-1340.68		-4.90807	3160.32	1928.92	-1927.75
128	Ethyl Acetate + 1-ethyl-3-methylimidazolium bis((trifluoromethyl)sulfonyl)imide	298.15	0.03249	0.0136505	2.57326	-2.14906	0.907089	0.51582		4.70528	0.014742	1.63424	-1.40077	0.939853	0.532101		9.24353	-0.0215552		744965	-1309.27		804.875	331.818	-1279.42		-4.28482	2365.47	1645.02	-858.46
129	Acetonitrile + 1-methyl-1-(3-(trimethylammonio)propyl)piperidinium dicyanamide	298.15	2.819	0.0145368	0.494202	1.98986	0.77353	1.28769		4.37515	0.0166853	0.639853	2.38368	0.979317	1.46408		11.0928	-0.016818		-1.98971e+07	59996.3		1932.51	1816.84	-1309.49		-0.287733	4042.02	3401.06	-1158.73
130	Acetonitrile + 3-(3-cyanopropyl)-1-methylimidazolium bis(fluorosulfonyl)amide	298.15	0.215	0.0160463	-0.512355	1.74131	0.391853	0.928402		3.85594	0.0231963	-1.78991	3.86132	0.417331	1.2133		6.76871	-0.00857767		-	-		1286.56	855.935	-1295.06		-3.8564	3834.13	3002.61	-415.703
131	Acetonitrile + 1-(3-(trimethylammonio)propyl)pyridinium dicyanamide	298.15	1.306	0.017508	-4.79919	7.90314	-1.41462	1.50303		3.52002	0.0255714	-2.76768	8.65116	-1.09844	2.1163		2.31099	0.00896766		-3.06126e+07	96027.8		1743.81	1912.92	-1293.84		7.41487	115.824	2583.16	-2578.25
132	Acetonitrile + 3-(3-cyanopropyl)-1-methylimidazolium trifluoromethanesulfonate	298.15	0.581	0.0152958	-0.400142	2.21511	1.03938	0.781958		3.89498	0.0208966	5.10461	-2.98677	3.22906	0.814864		11.2472	-0.0193913		-1.38443e+07	45308.3		1706.49	437.766	-1357.12		-10.9339	6538.97	2048.81	463.827
133	Acetonitrile + 1-ethyl-3-methylimidazolium trifluoromethanesulfonate	298.15	0.046	0.0133535	2.80744	-2.83212	1.36186	0.658641		4.24595	0.0171694	2.35156	-2.07707	1.24274	0.818941		2.84395	-0.00113713		-7.72102e+06	21540.3		744.888	485.986	14.5695		-0.926001	2248.35	3498.46	225.691
134	Acetonitrile + 1-hexyl-3-methylimidazolium tetrafluoroborate	298.15	0.216	0.0156592	0.5833	-0.544658	1.53381	1.04646		3.65594	0.0248276	0.464546	0.0734703	2.379	1.48068		0.591813	0.0065275		-1.76037e+07	47599.2		765.016	465.309	-1356.62		0.243995	3575.45	4627.98	1295.66
135	Acetonitrile + 1-butyronitrile-3-methylimidazolium tetrafluoroborate	298.15	0.303	0.0163006	-0.698524	1.76306	0.86688	0.790254		4.20146	0.0200243	0.0207395	1.3067	1.33052	0.925232		10.5494	-0.0189659		-8.91743e+06	31033.5		1439.77	820.057	-1393.53		-5.0598	5091.89	3172.57	215.833
136	Acetonitrile + 1-butyl-2,3-dimethylimidazolium thiocyanate	298.15	0.218	0.0179532	1.20364	-0.73286	0.68569	0.374752		8.85939	0.0100629	1.06341	-0.878829	0.434187	0.192306		39.0405	-0.106831		3.42412e+07	-101427		2014.1	2066.59	10.0002		-531.393	184475	7172.92	434.382
137	Acetonitrile + 1,2-dimethyl-3-propylimidazolium thiocyanate	298.15	0.1519	0.0189146	0.886402	-0.595069	1.02181	0.359436		8.23543	0.0106684	1.76351	-1.67552	0.828776	0.175533		33.0279	-0.0896005		2.45323e+07	-71225.4		1782.31	1277.42	-1163.42		-199.268	70896.2	5224.11	755.395
138	Acetonitrile + 1H-imidazolium octanoate	298.15	0.0713	0.016294	2.26472	-1.65643	1.05321	0.512703		1.69293	0.148031	6.54333	4.51001	4.02302	1.67626		-3.56748	0.0259949		-	-		1396.95	831.595	-1309.57		23.399	-3668.71	3326.68	65.1349
139	Acetonitrile + 1-ethyl-3-methylimidazolium tetrafluoroborate	298.15	0.0415	0.0131019	0.770304	-0.568792	0.845717	0.756119		3.11874	0.0321896	1.01629	-0.41993	1.84344	1.22677		0.771873	0.0042035		-8.82184e+06	25277.1		615.292	273.596	-4736.02		4.21187	-616.313	1322.99	-1223.06
140	Acetonitrile + 1-butyl-3-methylimidazolium trifluoromethanesulfonate	298.15	0.0824	0.0152842	-2.31657	2.61756	0.556672	0.775768		3.1428	0.0340639	-3.12774	3.87325	1.77196	1.20916		3.89582	-0.00280192		-1.26029e+07	36123.7		922.869	364.27	-1099.36		-12.0685	7773.24	4565.93	1203.72
141	Acetonitrile + 1-butyl-2,3-dimethylimidazolium tetrafluoroborate	298.15	0.65	0.016353	1.15061	-1.35807	2.44538	1.43958		3.86851	0.0226885	1.65508	-1.52749	3.69904	1.95463		-1.22628	0.00974566		-2.50976e+07	66358.8		580.502	235.521	-1299.58		16.1759	-1370.62	4990.3	2234.74
142	Acetonitrile + 1-butyl-3-methylimidazolium tetrafluoroborate	303.15	0.0842	0.0158042	0.263544	-0.112082	1.03329	0.900852		3.16322	0.0343214	0.908032	-0.0595986	2.32587	1.46234		-0.260831	0.00825915		-1.55323e+07	43478.2		702.339	358.36	-1296.23		7.34718	-1043.07	2449.79	-87.1977
143	Benzene + 2-octylisoquinolinium bis((trifluoromethyl)sulfonyl)amide	298.15	0.369	0.0162494	-2.50648	4.35636	0.941629	0.578086		3.87774	0.0235571	-2.29888	5.32584	1.51001	0.792324		9.59731	-0.0171528		-1.13087e+07	31221.9		1336.85	-401.861	-1339.79		1.52956	756.093	-617.936	618.187
144	Benzene + 1-butyl-3-methylimidazolium trifluoromethanesulfonate	298.15	0.088	0.0150315	-24.6351	10.7482	0.412145	0.560553		4.42307	0.0177826	-27.9964	12.543	0.389756	0.633153		7.20452	-0.0129222		-1.0643e+06	5834.32		1024.74	502.694	-1297.39		-42.7273	19230.9	5070.14	1561.25
145	Benzene + 1-butyl-3-methylimidazolium thiocyanate	298.15	0.0628	0.0156423	12.8056	-3.14717	0.777329	0.567561		3.94111	0.0225507	17.8107	-4.56581	1.01385	0.739096		5.06659	-0.00750422		-1.61585e+06	8492.64		906.738	630.637	-1293.07		-46.6262	21312	5890.47	1488.42
146	Benzene + 1-ethyl-3-methylimidazolium bis((trifluoromethyl)sulfonyl)imide	298.15	0.033	0.0134257	83.0424	-27.7471	1.52869	0.397078		4.49	0.0157007	94.7259	-32.5838	1.90104	0.42466		6.52193	-0.0110171		-277295	3434.59		988.031	843.434	-1359.07		-50.9708	22721.1	6151.88	755.256
147	Pyridine + 1-ethyl-3-methylimidazolium acetate	303.15	0.1032	0.0161061	1.18535	-1.155	1.07267	0.763085		3.06301	0.0391835	1.48604	-1.1419	2.31005	1.27701		1.50302	0.00132217		-5.41962e+06	17912.8		624.076	208.557	-1.43789e+11		0.900416	1237.71	2907.9	1024.62
148	Pyridine + 1-methyl-3-octylimidazolium chloride	303.15	7.3	0.0151682	-4.3387	5.31229	1.93683	1.91292		4.77766	0.015242	-4.00143	4.90496	1.83334	2.1192		-0.0287642	0.00785318		-1.8955e+07	50273.9		793.899	120.222	-905.982		6.57774	-778.019	1728.18	914.574
149	Pyridine + 1-hexyl-3-methylimidazolium chloride	303.15	5.718	0.0160954	-4.50645	4.71815	2.3049	1.89189		4.69491	0.0165777	-4.39654	4.71327	2.27208	2.06766		-3.46959	0.0161516		-2.11803e+07	57557.9		602.194	24.8894	-1343.54		6.97835	-1690.55	175.813	-312.673
150	Pyridine + 2-octylisoquinolinium bis((trifluoromethyl)sulfonyl)amide	298.15	0.369	0.0162939	2.1793	-2.66042	2.15085	0.608534		3.66851	0.025648	-0.493699	0.219576	2.48319	0.949516		7.02508	-0.011537		-6.99205e+06	19499.5		1091.03	427.646	-1390.93		-161.444	68369.9	7184.51	2744.47
151	Thiophene + 1-(3-hydroxypropyl)pyridinium tricyanomethanide	298.15	0.0925	0.0167344	10.8185	-4.3707	1.52448	0.300929		3.08252	0.0407515	8.08297	0.122701	2.09674	0.528258		10.5471	-0.02017		1.75802e+06	1174.11		1301.27	196.912	-1285.41		-3.13134	2305.06	479.961	-665.948
152	Thiophene + 1-(2-hydroxyethyl)pyridinium tricyanomethanide	298.15	0.097	0.0175952	-24.3632	15.8383	-1.59403	0.772292		2.89601	0.049102	-25.1444	17.2851	-1.43069	1.3126		8.03961	-0.0144997		-98212.5	5493.19		1236.74	1353.74	-1352.21		-49.8185	22758.3	6384.71	-803.666
153	Thiophene + 2-octylisoquinolinium bis((trifluoromethyl)sulfonyl)amide	298.15	0.369	0.0162494	3.70126	-4.20837	2.47569	0.485182		3.57825	0.0266424	7.13102	-7.38654	3.81345	0.775825		10.9259	-0.0203057		-5.25769e+06	16510.7		1495.51	1261.35	-1340.04		-245.091	103081	7758.19	2351.11
154	Thiophene + 1-butyl-3-methylimidazolium thiocyanate	298.15	0.0574	0.0156503	25.7009	-18.8404	2.63857	0.376899		3.68515	0.0258163	28.3585	-20.7489	3.03942	0.531665		5.83367	-0.00980082		-1.64403e+07	59588.2		1205.94	1449.31	-628.625		-49.4735	22639.5	5950.7	-74.8066
155	Thiophene + 1-butyl-3-methylimidazolium bis(trifluoromethylsulfonyl)imide	298.15	0.05132	0.0148442	9.86871	-7.05964	0.907052	0.457634		4.1042	0.020162	12.4067	-8.8278	1.1195	0.55652		6.80643	-0.0124814		-1.67966e+06	6606.3		1192.39	1338.86	-1.48186e+06		-41.5144	19068.5	5999.51	-531.599
156	Dimethyl sulfoxide + 1-ethyl-3-methylimidazolium trifluoromethanesulfonate	298.15	0.046	0.0133535	-0.907308	0.878287	0.38935	0.363907		4.90318	0.0133794	-0.624385	0.603788	0.419711	0.365297		4.36934	-0.00812058		88771.2	861.788		567.003	87.6482	-1309.67		0.174949	321.392	-703.607	-1999.78
157	Dimethyl sulfoxide + 1-hexyl-3-methylimidazolium tetrafluoroborate	298.15	0.216	0.0153421	-0.959901	1.43143	0.319957	0.803719		4.10932	0.0206361	-0.828337	1.45565	0.551922	0.965759		3.90047	-0.0065825		-6.07778e+06	15940.1		542.963	200.689	-1.24983e+07		-0.731798	1130.91	2116.97	10.709
158	Dimethyl sulfoxide + 1-ethyl-3-methylimidazolium acetate	303.15	0.1032	0.0161061	0.502785	-0.466608	0.743803	0.591987		3.51713	0.0293244	-0.305399	0.375028	1.07794	0.869107		3.45251	-0.00518994		-3.29233e+06	10948		569.734	128.715	-5700.39		1.02565	16.5719	-931.827	-2259.85
159	Dimethyl sulfoxide + 1-methyl-3-octylimidazolium chloride	303.15	7.3	0.0151682	-3.7414	5.26996	0.984835	1.72577		5.29405	0.0139115	-2.28307	3.53464	0.655479	1.71431		3.76813	-0.00393462		-1.48853e+07	36997.4		711.61	178.816	-3766.93		1.12492	374.242	802.513	-792.636
160	Dimethyl sulfoxide + 1-hexyl-3-methylimidazolium chloride	303.15	5.718	0.0160954	-10.4344	12.3668	-0.983506	2.09235		5.09465	0.0152318	-8.92676	10.4512	-0.967513	2.1012		0.0463615	0.00470029		-1.71649e+07	43452.5		491.174	97.0137	-1343.57		2.74609	-414.36	694.498	-700.203
161	Dimethyl sulfoxide + 1-ethyl-3-methylimidazolium tetrafluoroborate	298.15	0.0415	0.0126635	-0.313734	0.415546	0.371361	0.358013		4.14447	0.018141	-0.340446	0.441768	0.501566	0.424287		4.73167	-0.00907409		878320	-581.349		562.161	131.663	-1350.32		-1.30093	1053.47	961.221	-563.302
162	Dimethyl sulfoxide + trimethylammonium dihydrogen phosphate	298.15	0.00764	0.0161493	0.0630538	-0.0294908	0.13073	0.154409		3.37056	0.0368735	0.103733	-0.00896448	0.140656	0.254638		4.16539	-0.0107076		2.27394e+06	-5089.19		256.493	137.983	-1260.97		-5.72656	2315.42	2985.09	3.34142
163	Dimethyl sulfoxide + trimethylammonium acetate	298.15	0.00276	0.0199432	0.165787	-0.28706	0.29302	-0.0998392		3.43491	0.0267748	0.103861	-0.194009	0.32287	-0.127221		-9.45306	0.035016		-1.43673e+07	51979.4		386.089	3.06529	7016.29		31.353	-8421.2	2152.63	2535.01
164	Dimethyl sulfoxide + trimethylammonium hydrogen sulfate	298.15	0.0051	0.0201413	0.093199	-0.0543579	0.118379	0.0561227		2.46289	0.0853741	0.201859	0.0255209	0.116544	0.127652		-3.72083	0.0163076		-7.73152e+06	29813.9		341.316	240.966	-1261.33		12.4809	-2915.16	3509.31	-23.0551
165	Dimethyl sulfoxide + 1-butyl-3-methylimidazolium tetrafluoroborate	293.15	0.137	0.0148906	-0.341455	0.545274	0.490649	0.622783		3.66638	0.0253688	-0.69883	1.13381	0.675104	0.920652		5.23118	-0.0106146		-3.42947e+06	10096.4		529.671	183.199	-1282.03		0.234034	483.666	1007.34	-1139.17
166	Dimethyl sulfoxide + diethylammonium hydrogen sulfate	298.15	0.0258	0.0147539	0.238905	-0.0616029	0.260516	0.254928		3.90455	0.0228182	0.368562	-0.156829	0.377508	0.344367		4.64057	-0.00844039		1.33688e+06	967.765		593.578	372.534	-1349.19		0.374392	1151.48	2898.58	-155.384
167	Dimethyl sulfoxide + 1-butyl-2,3-dimethylimidazolium tetrafluoroborate	298.15	0.65	0.0160426	1.57641	-2.01051	1.88634	0.979978		4.11941	0.0209022	1.41392	-1.83589	2.28093	1.26009		1.11959	0.000604319		-1.09577e+07	28085.3		426.091	39.0892	2.27338e+08		1.75465	985.133	3173.12	2470.78
168	Dimethyl sulfoxide + triethylammonium acetate	298.15	0.02412	0.0186628	0.462404	-0.326643	0.322879	0.202058		5.24677	0.0168072	0.417898	-0.328259	0.315864	0.186016		12.4293	-0.0337409		8.80169e+06	-24340.3		669.174	510.62	-1291.9		-39.3675	14124.5	4013.97	266.921
169	Dimethyl sulfoxide + diethylammonium acetate	298.15	0.01636	0.0161589	0.438743	-0.285527	0.212358	0.174256		3.65678	0.0274761	0.470056	-0.168467	0.215158	0.241147		3.41222	-0.00520352		2.05292e+06	-1553.39		631.462	585.821	-1313.21		-4.1471	3737.38	4747.96	17.1598
170	Dimethyl sulfoxide + 1-butyl-3-methylimidazolium bis(trifluoromethylsulfonyl)imide	298.15	0.0496	0.0149763	0.378111	-0.193003	0.440631	0.380679		4.12917	0.0207705	0.428678	-0.146192	0.485241	0.481744		6.88833	-0.0162105		-312828	320.716		596.038	286.017	-1831.96		-3.34697	1715.83	1373.85	-1166.84
171	Dimethyl sulfoxide + triethylammonium dihydrogen phosphate	298.15	0.0643	0.00976674	1.01189	-0.852813	0.454791	0.40932		3.99726	0.0118359	1.27364	-0.921404	0.481979	0.515409		-1.97195	0.015042		-9.77648e+06	37226		817.331	862.507	-1009.51		29.4747	-4526.71	5598.76	165.227
172	Dimethyl sulfoxide + triethylammonium hydrogen sulfate	298.15	0.235	0.0156492	3.27239	-3.25083	1.19142	0.195503		4.7989	0.0167776	3.06505	-2.95266	1.10092	0.252364		17.7236	-0.043069		-2.7527e+06	20645.4		1638.95	1794.25	-1267.74		-247.672	90380.7	6772.27	567.028
173	Dimethylformamide + 1-ethyl-3-methylimidazolium acetate	303.15	0.1032	0.0161061	1.90877	-1.95559	1.30092	0.810497		3.04545	0.0390222	3.74651	-3.45215	2.87018	1.39994		0.681199	0.0028502		-7.29361e+06	21919.8		527.891	97.3773	1.86143e+06		1.03907	1767.32	3511.81	2511.72
174	Dimethylformamide + 1-methyl-3-octylimidazolium chloride	303.15	7.3	0.0151682	1.01482	-0.543578	3.20977	2.08385		4.78375	0.0154421	1.21415	-0.686243	3.05343	2.27322		-3.25458	0.0144378		-2.11775e+07	53357.5		428.456	160.787	-1050.82		5.68802	-1401.37	1056.44	-1330.44
175	Dimethylformamide + 1-hexyl-3-methylimidazolium chloride	303.15	5.718	0.0160954	5.56029	-5.70278	4.43108	1.97575		4.72896	0.0164058	5.6867	-5.57198	4.05856	2.244		-5.44477	0.0192562		-2.26203e+07	58186.5		281.111	57.0714	-1370.54		-2.10503	73438.6	6664.25	12024.9
176	Dimethylformamide + 1-butyl-3-methylimidazolium trifluoromethanesulfonate	298.15	0.0824	0.0152842	5.4166	-6.22399	2.47558	0.459946		3.55527	0.0258493	7.77207	-8.80544	3.79432	0.630441		2.58517	-0.00155616		-6.74853e+06	19694.5		621.882	193.111	-1315.26		-118.849	49343.6	5463.85	5334.55
177	Dimethylformamide + 1-butyl-3-methylimidazolium hexafluorophosphate	303.15	0.1876	0.0118388	3.36554	-5.36127	3.39761	0.694927		4.53676	0.0130225	3.0662	-4.57746	2.80367	1.0709		-1.24316	0.00516558		-1.13959e+07	26696.2		24.5161	202.795	-825.119		-568.859	204996	13401	4050.54
178	Dimethylformamide + 1-hexyl-1-methylpyrrolidinium bis(trifluoromethanesulfonyl)imide	295.2	0.12	0.0135341	6.69299	-2.18615	0.668183	0.758577		3.75757	0.0208866	7.72192	-1.82826	0.830983	1.0494		3.35149	-0.0037878		-6.53855e+06	17228.5		686.847	92.1791	-1331.82		0.735368	536.565	1092.87	-1263.26
179	Dimethylformamide + 1-ethyl-3-methylimidazolium tetrafluoroborate	303.15	0.028	0.0132304	0.306923	-0.304003	0.573844	0.548533		3.32354	0.0288636	0.470381	-0.34987	1.05049	0.818736		1.70012	-0.000719909		-3.10934e+06	10126		452.375	119.932	-1084.06		1.16868	117.925	874.194	-747.831
180	Glycerol + dodecyltriethylphosphonium 2-cyanopyrrolide	298.15	0.296	0.0181039	1.79762	-2.26012	0.730391	-0.45152		4.56671	0.0196155	1.80146	-2.25392	0.740371	-0.476758		3.51813	-0.00662941		8.34945e+06	-17010.6		389.698	754.281	-1294.72		-13.927	4987.27	4508.85	-4507.82
181	Glycerol + butyltriethylphosphonium 2-cyanopyrrolide	298.15	0.137	0.0180228	1.03391	-1.40159	0.496156	-0.445408		6.30062	0.0153934	1.02311	-1.42938	0.530828	-0.375941		21.9721	-0.0722619		2.20629e+07	-66489.2		-72.0936	438.146	-1229.36		-58.2739	18089.9	7714.27	-4227.03
182	Triethanolamine + tributyl(dodecyl)phosphonium 2-cyanopyrrolide	298.15	0.389	0.0160336	0.279647	-0.347874	0.137294	-0.164356		5.1239	0.0174688	0.2655	-0.345842	0.153494	-0.16266		18.3634	-0.0579922		1.04069e+07	-31380.3		184.384	340.651	-1288.94		-233.736	73820.9	9425.4	-810.616
183	Triethanolamine + dodecyltriethylphosphonium 2-cyanopyrrolide	298.15	0.31	0.0187512	1.41023	-2.27555	1.26007	-0.511874		4.93897	0.0189733	1.39673	-2.24255	1.23677	-0.500957		33.8165	-0.107513		1.78495e+07	-55098		502.01	-122.352	-1318.49		-2664.87	834586	5864.33	8555.81
184	Triethanolamine + butyltriethylphosphonium 2-cyanopyrrolide	298.15	0.137	0.0180228	1.48421	-2.43266	1.41295	-0.71993		4.97858	0.0201225	1.45393	-2.41347	1.41808	-0.709112		32.4168	-0.102641		2.49385e+07	-77217.1		438.392	101.682	-1304.05		-9.96667	3107.43	-7693.12	-7282.1

## Sheet: Table S2.B
No.	Binary System	AARD (%)
		Current study			Grunberg & Nissan	Fang & He	Jouyban–Acree	Eyring–MTSM
		Extrapolation Mode	Interpolation Mode
1	Water + 1-ethylpyridinium triflate	5.44	4.59		13.92	5.57	6.41	3.12
2	Water + butylammonium acetate	4.68	4.06		27.93	11.4	8.97	5.16
3	Water + 1-butyl-1-methylpyrrolidinium dicyanamide	8.52	2.15		26	7.96	5.82	1.01
4	Water + 1-ethyl-1-methylpiperidinium ethyl sulfate	7.75	2.46		31.25	10	5.3	2.23
5	Water + 1-butyl-1-methylpiperidinium dicyanamide	5.41	2.3		32.12	8.5	7.41	2.94
6	Water + 1-butyl-4-methylpyridinium thiocyanate	4.62	2.96		21.35	5.09	5.97	2
7	Water + 1,2-dimethyl-3-propylimidazolium tetrafluoroborate	3.64	2.18		17.74	6.11	4.65	1.83
8	Water + 1-ethyl-3-methylimidazolium thiocyanate	2.04	1.19		13.62	1.51	3.23	0.89
9	Water + 3-hexyl-1-methyl-1H-imidazolium bromide	15.6	4.77		25.67	13.68	8.8	6.08
10	Water + 1-ethyl-3-methylimidazolium dicyanamide	2	1.34		16.01	2.02	2.48	0.53
11	Water + 1-butyl-3-methylimidazolium tricyanomethane	6.74	3.78		10.91	3.64	5.28	2.51
12	Water + 1H-imidazolium octanoate	3.88	3.15		43.21	-	9.56	5.96
13	Water + 1-butyl-3-methylimidazolium trifluoromethanesulfonate	4.1	2.78		30.26	12.94	7.94	3.16
14	Water + 1-ethyl-1-methylpyrrolidinium ethyl sulfate	6.2	2.48		29.68	5.17	7	2.64
15	Water + 1-ethyl-3-methylimidazolium tetrafluoroborate	3.1	2.7		11.55	5.55	6.12	5.96
16	Water + 1-butyl-3-methylimidazolium thiocyanate	3.85	2.69		20.69	3.04	4.88	1.82
17	Water + 2-hydroxyethylammonium lactate	13.11	3.41		19.52	7.45	4.36	2.79
18	Water + 1,1,3,3-tetramethylguanidinium lactate	10.67	2.88		31.54	4.11	7	1.8
19	Water + 1-butyl-3-methylimidazolium tetrafluoroborate	5.91	1.85		2.83	1.49	7.07	1.13
20	Water + ethylammonium nitrate	3.71	2.83		17.56	17.66	9.51	15.48
21	Water + 1-butyl-3-methylimidazolium dicyanamide	5.32	3.58		1.53	6.49	2.15	1.02
22	Water + 1-butyl-1-methylpyrrolidinium thiocyanate	9.84	3.1		23.17	2.22	4.57	1.73
23	Water + 1-butylpyridinium tetrafluoroborate	4.52	2.99		4.66	4.3	4.06	4.52
24	Water + 1-methylimidazolium acetate	2.25	1.28		32.59	11.73	5.42	1.5
25	Water + 1,1,3,3-tetramethylguanidinium imidazol-1-ide	3.9	2.52		33.5	5.37	10.01	2.81
26	Water + 1-propylpyridinium tetrafluoroborate	4.52	3.17		4.13	4.15	3.8	3.62
27	Water + 1-ethyl-3-methylimidazolium acetate	4.16	3.11		32.23	8.89	6.48	1.55
28	Water + 1-ethyl-3-methylimidazolium trifluoromethanesulfonate	11.44	4.9		34.52	18.72	19.48	6.62
29	Water + 1-ethyl-3-methylimidazolium trifluoroacetate	8.49	6.03		32.44	16.31	16.34	6.34
30	Water + n-butylammonium nitrate	1.33	1.05		10.72	1.67	2.91	1.12
31	Water + 1-methyl-3-octylimidazolium chloride	15.67	9.53		62.38	47.96	20.7	12.07
32	Water + 1-hexyl-3-methylimidazolium chloride	12.27	8.24		35.66	18	9.51	8.97
33	Water + 1,3-dimethylimidazolium methylsulfate	1.84	1.68		16.63	2.28	3.33	1.53
34	Water + 1-butyl-3-methylimidazolium acetate	3.24	2.1		24.02	1.86	6.42	2.17
35	Water + 1-butyl-3-methylimidazolium methyl sulfate	4.11	3.26		18.05	7.12	6.32	2.06
36	Water + 1-butyl-4-methylpyridinium tetrafluoroborate	4.76	3.3		28.33	48.49	11.77	8.84
37	Water + 1-hexyl-3-methylimidazolium tetrafluoroborate	2.9	2.58		16.57	6.93	5.68	3.53
38	Water + 1-ethyl-3-methylimidazolium ethyl sulfate	2.67	1.99		22.71	5.23	6.03	1.29
39	Water + (3-aminopropyl)tributylphosphonium L-leucinate	9.67	3.45		46.35	5.88	12.67	4.72
40	Water + (3-aminopropyl)tributylphosphonium L-valinate	9.67	3.44		46.35	6.54	12.67	4.72
41	Water + (3-aminopropyl)tributylphosphonium L-alaninate	11.07	3.1		46.87	10.37	12.56	3.96
42	Water + 1-butyl-1-methylpiperidinium thiocyanate	3.07	2.2		25.29	4.62	4.02	2.1
43	Methanol + N-(bis(dimethylamino)methylene)-N-ethylethanaminium bis((trifluoromethyl)sulfonyl)amide	1.04	0.89		16.86	3.31	4.54	1.58
44	Methanol + 1-butyl-1-methylpyrrolidinium bis[(trifluoromethyl)sulfonyl]imide	2.51	1.31		27.62	14.88	9.73	9.47
45	Methanol + N,N-dimethyl-N-(3-sulfopropyl)cyclohexanaminium 4-methylbenzenesulfonate	6.11	2.15		17.33	-	2.61	2.1
46	Methanol + 1-methyl-1-(3-(trimethylammonio)propyl)piperidinium dicyanamide	5.56	3.6		14.59	13.71	9.25	5.9
47	Methanol + 1-(3-(trimethylammonio)propyl)pyridinium dicyanamide	13.82	4.98		38.32	20.22	16.32	8.31
48	Methanol + 1-ethyl-3-methylimidazolium tetrafluoroborate	3.34	1.71		5.96	3.27	3.69	2.12
49	Methanol + 1,3-dimethylimidazolium dimethylphosphate	5.96	2.17		12.36	2.85	4.67	2.07
50	Methanol + 1-butyl-3-methylimidazolium tetrafluoroborate	4.23	2.06		7.03	3.06	4.67	2.42
51	Methanol + 1-ethyl-3-methylimidazolium ethyl sulfate	6.07	3.07		12.4	4.07	5.14	3.01
52	Methanol + 1-ethyl-3-methylimidazolium bis((trifluoromethyl)sulfonyl)imide	1.24	0.75		15.32	3.43	2.35	0.81
53	Methanol + 1-butyl-3-methylimidazolium bis(trifluoromethylsulfonyl)imide	2.2	1.55		18.91	3.51	4.81	3.19
54	Methanol + trihexyl(tetradecyl)phosphonium chloride	6.6	5.57		41.12	8.46	9.63	5.1
55	Methanol + 1-propylpyridinium tetrafluoroborate	9.47	3.8		19.44	14.22	6.2	4.91
56	Methanol + 1,1,3,3-tetramethylguanidinium imidazol-1-ide	2.9	1.07		10.78	1.94	2.24	0.91
57	Methanol + 1-butyl-3-methylimidazolium thiocyanate	6.27	1.95		12.19	4.22	5.27	3.35
58	Methanol + n-butylammonium nitrate	1.83	1.67		7.5	2.35	2.98	2.1
59	Methanol + 1-methyl-3-octylimidazolium chloride	5	3.65		7.72	4.34	10.57	4.55
60	Methanol + N-ethylpiperazinium propionate	4.8	1.12		10.57	3.57	1.92	1.04
61	Methanol + 1-butyl-4-methylpyridinium tetrafluoroborate	7.07	1.15		7.34	2.49	2.72	3.61
62	Ethanol + N-(bis(dimethylamino)methylene)-N-ethylethanaminium bis((trifluoromethyl)sulfonyl)amide	1.65	1.31		10.83	1.83	3.66	1.24
63	Ethanol + 1-methyl-1-(3-(trimethylammonio)propyl)piperidinium dicyanamide	5.09	3.79		13.69	9.42	10.25	5.87
64	Ethanol + 1-(3-(trimethylammonio)propyl)pyridinium dicyanamide	9.58	2.73		28.66	15.96	13.9	6.72
65	Ethanol + butylammonium acetate	0.52	0.46		7.33	4.34	3.41	0.96
66	Ethanol + butylammonium formate	0.93	0.75		7.76	4.35	1.94	0.5
67	Ethanol + 1-ethyl-3-methylimidazolium acetate	11.11	2.46		6.75	4.16	10.95	2.81
68	Ethanol + 2-ethyl-1,1,3,3-tetramethylguanidinium ethyl sulfate	4.66	1.05		7.38	2.24	6.14	1.93
69	Ethanol + 2-ethyl-1,1,3,3-tetramethylguanidinium bis(trifluoromethanesulfonyl)imide	1.35	1.25		8.1	2.91	2.64	1.5
70	Ethanol + 1-ethylpyridinium dicyanamide	2.26	2.03		5.99	2.85	4.01	2.11
71	Ethanol + 1,3-dimethylimidazolium dimethylphosphate	8.02	6.21		8.68	8.26	8.36	5.37
72	Ethanol + 1H-imidazolium octanoate	8.64	2.49		15.07	-	7.91	1.69
73	Ethanol + 1-butyl-3-methylimidazolium thiocyanate	5.48	2.82		8.06	3.66	6.6	2.43
74	Ethanol + 1,1,3,3-tetramethylguanidinium imidazol-1-ide	3.11	0.56		1.79	2.48	0.78	0.74
75	Ethanol + n-butylammonium nitrate	1.09	0.98		7.06	3.72	2.3	1.41
76	Ethanol + 1-ethyl-3-methylimidazolium dicyanamide	1.88	1.6		5.91	2.23	4.49	1.29
77	Ethanol + 1-ethyl-3-methylimidazolium bis((trifluoromethyl)sulfonyl)imide	3.78	3.19		9.88	3.02	2.92	1.09
78	Ethanol + 1-butyl-3-methylimidazolium bis(trifluoromethylsulfonyl)imide	4.47	3.59		13.16	4.06	3.79	1.91
79	Ethanol + 1-butyl-3-methylimidazolium nitrate	4.73	1.21		10.2	8.33	8.63	3.84
80	Ethanol + N-ethylpiperazinium propionate	3.87	0.93		4.23	2.3	1.87	0.84
81	Ethanol + 1-butyl-3-methylimidazolium tetrafluoroborate	3.82	2.48		10.76	8.21	4.82	4.01
82	Ethanol + 1-hexyl-3-methylimidazolium tetrafluoroborate	3.01	2.32		9.31	6.07	4.59	4.96
83	Ethanol + 1-methyl-3-octylimidazolium tetrafluoroborate	3.87	3.26		9.49	4.64	4.15	2.81
84	Ethanol + 1,3-dimethylimidazolium methylsulfate	3.7	1.68		5.03	2.2	4.66	4.13
85	Ethanol + 1-butyl-3-methylimidazolium methyl sulfate	4.04	1.68		5.44	2.3	4.72	1.77
86	Ethanol + 1-hexyl-3-methylimidazolium bis[(trifluoromethyl)sulfonyl]imide	3.02	1.93		13.65	2.15	2.5	1.42
87	Ethanol + 1-methyl-3-octylimidazolium chloride	3.1	2.03		4.96	3.96	9.64	3.83
88	Ethanol + 1-ethylpyridinium ethyl sulfate	2.55	1.95		6.94	4.03	4.78	5.54
89	Ethanol + 1-ethyl-3-methylimidazolium tetrafluoroborate	2.8	1.47		4.65	4.2	5.62	3.66
90	Propanol + 1-butyl-3-methylimidazolium bis(trifluoromethylsulfonyl)imide	2.81	1.69		7.25	3.73	2.33	3.04
91	Propanol + 1-allyl-3-methyl-1H-imidazolium bis((trifluoromethyl)sulfonyl)amide	6.2	2.56		7.61	4.43	2.99	1.9
92	Propanol + triethylsulfonium bis((trifluoromethyl)sulfonyl)imide	4.9	3.01		6.62	3.6	2.98	2.57
93	Propanol + 1-ethyl-3-methylimidazolium methylsulfate	8.2	6.73		31.38	26.44	17.16	9.54
94	Propanol + 1,3-dimethylimidazolium methylsulfate	4.72	2.28		14.31	10.88	4.71	1.56
95	Propanol + butylammonium formate	1.45	0.71		5.99	4.29	1.49	0.39
96	Propanol + 1-ethyl-3-methylimidazolium acetate	8.5	1.65		4.73	2.96	8.88	2.02
97	Propanol + 2-ethyl-1,1,3,3-tetramethylguanidinium bis(trifluoromethanesulfonyl)imide	1.41	1.06		7.97	1.44	2.24	0.87
98	Propanol + 2-ethyl-1,1,3,3-tetramethylguanidinium ethyl sulfate	5.05	2.38		4.1	2.3	5.59	2
99	Propanol + 1-ethylpyridinium dicyanamide	1.93	1.78		3.49	2.4	3.44	1.92
100	Propanol + 1,3-dimethylimidazolium dimethylphosphate	5.11	2.06		5.04	3.37	5.54	3.13
101	Propanol + 1-butyl-3-methylimidazolium thiocyanate	5.19	4.09		6.21	4.45	6.96	3.32
102	Propanol + 1,1,3,3-tetramethylguanidinium imidazol-1-ide	2.71	0.41		0.95	2.33	0.89	0.94
103	Propanol + n-butylammonium nitrate	1.93	1.14		5.78	4.14	1.93	5.25
104	Propanol + 1-hexyl-3-methylimidazolium tetrafluoroborate	5.32	3.1		3.72	4.02	4.78	4.6
105	Propanol + N-ethylpiperazinium propionate	3.35	0.77		2.95	1.62	2.46	1.49
106	Propanol + 1-methyl-3-octylimidazolium chloride	4.8	4.02		4.13	3.89	11.43	10.1
107	Propanol + 1-ethylpyridinium ethyl sulfate	2.37	2.06		4.32	3.23	4.6	1.87
108	Propanol + 1-ethyl-3-methylimidazolium ethyl sulfate	2.77	1.95		4.4	1.94	4.37	1.46
109	Butanol + benzyldimethyldodecylammonium bis(trifluoromethylsulfonyl)imide	9.96	3.97		10.63	7.3	5.71	3.74
110	Butanol + 1-butyl-3-methylimidazolium bis(trifluoromethylsulfonyl)imide	3.54	1.58		5.82	3.41	2.19	3.14
111	Butanol + 1-butyl-3-methylimidazolium trifluoromethanesulfonate	3.59	2.4		6.12	6.95	4.76	6.02
112	Butanol + 1-ethyl-3-methylimidazolium methylsulfate	4.88	1.13		10.76	8.38	2.8	0.57
113	Butanol + 1,3-dimethylimidazolium methylsulfate	5.55	1.7		13.86	11.46	4.23	1.19
114	Butanol + butylammonium formate	1.36	0.64		5.67	5.04	2.03	0.71
115	Butanol + 1-butyl-3-methylimidazolium thiocyanate	3.42	2.32		2.55	1.68	6.04	1.39
116	Butanol + 1-ethyl-3-methylimidazolium ethyl sulfate	3.12	2.3		6.4	4.69	4.23	3.92
117	Butanol + 1,1,3,3-tetramethylguanidinium imidazol-1-ide	3.01	0.82		2.22	3.07	1.08	2.81
118	Butanol + 2-octylisoquinolinium bis((trifluoromethyl)sulfonyl)amide	4.01	2.12		8.18	3.54	3.23	2.49
119	Butanol + n-butylammonium nitrate	2.8	2.15		5.79	5.03	2.94	3.92
120	Butanol + N-ethylpiperazinium propionate	12	2.4		15.53	12.15	8.57	2.02
121	1,2-Propanediol + choline bis(trifluoromethylsulfonyl)imide	14.46	3.06		7.1	6.65	6.7	4.54
122	1,2-Propanediol + butyltrimethylammonium bis(trifluoromethylsulfonyl)imide	10	4.32		10.04	10.29	6.44	9.63
123	1,4-Dioxane + 1-ethyl-3-methylimidazolium tetrafluoroborate	2.31	1.6		3.22	1.5	2.37	1.28
124	Ethylene glycol + 1-ethyl-3-methylimidazolium tetrafluoroborate	8.99	4.49		4.14	1.55	5.35	1.14
125	Ethylene glycol + 1-butyl-3-methylimidazolium tetrafluoroborate	11.5	4.42		3.95	3.01	5.24	2.19
126	Ethyl Acetate + 1-butyl-3-methylimidazolium tetrachloroferrate	3.02	0.82		11.23	5.02	3.49	1.25
127	Ethyl Acetate + 1-butyl-3-methylimidazolium trifluoromethanesulfonate	5.62	3.18		24.37	19.7	16.84	12.75
128	Ethyl Acetate + 1-ethyl-3-methylimidazolium bis((trifluoromethyl)sulfonyl)imide	4.59	2.57		8.61	3.47	3.63	2.21
129	Acetonitrile + 1-methyl-1-(3-(trimethylammonio)propyl)piperidinium dicyanamide	5.23	4.3		34.67	14	9.93	5.22
130	Acetonitrile + 3-(3-cyanopropyl)-1-methylimidazolium bis(fluorosulfonyl)amide	4.36	3.29		21.59	-	8.07	4.98
131	Acetonitrile + 1-(3-(trimethylammonio)propyl)pyridinium dicyanamide	10.78	6.03		41.51	25.62	18	10.4
132	Acetonitrile + 3-(3-cyanopropyl)-1-methylimidazolium trifluoromethanesulfonate	11.03	9.2		16.96	12	9.97	9.71
133	Acetonitrile + 1-ethyl-3-methylimidazolium trifluoromethanesulfonate	3.27	1.84		10.68	3.99	2.66	2.16
134	Acetonitrile + 1-hexyl-3-methylimidazolium tetrafluoroborate	5.42	2.06		9.01	2.17	4.94	1.28
135	Acetonitrile + 1-butyronitrile-3-methylimidazolium tetrafluoroborate	6.05	5.45		20.42	7.44	7.59	5.74
136	Acetonitrile + 1-butyl-2,3-dimethylimidazolium thiocyanate	26.65	8.94		36.23	23.66	26.17	3.6
137	Acetonitrile + 1,2-dimethyl-3-propylimidazolium thiocyanate	20.83	5.87		26.97	14.23	20.5	4.3
138	Acetonitrile + 1H-imidazolium octanoate	13.36	5.26		19.44	-	11.64	5.68
139	Acetonitrile + 1-ethyl-3-methylimidazolium tetrafluoroborate	4.26	1.34		6.31	2.03	4.23	1.36
140	Acetonitrile + 1-butyl-3-methylimidazolium trifluoromethanesulfonate	5.1	2.91		8.73	4.95	5.72	4.56
141	Acetonitrile + 1-butyl-2,3-dimethylimidazolium tetrafluoroborate	6.61	3.75		6.19	3.46	6.07	2.48
142	Acetonitrile + 1-butyl-3-methylimidazolium tetrafluoroborate	5.23	0.79		7.6	1.09	3.9	0.98
143	Benzene + 2-octylisoquinolinium bis((trifluoromethyl)sulfonyl)amide	9.11	6.43		16.54	27.77	12.5	15
144	Benzene + 1-butyl-3-methylimidazolium trifluoromethanesulfonate	1.54	1.25		4.5	1.85	2.16	1.57
145	Benzene + 1-butyl-3-methylimidazolium thiocyanate	1.37	0.98		4.54	1.96	1.48	1.01
146	Benzene + 1-ethyl-3-methylimidazolium bis((trifluoromethyl)sulfonyl)imide	1.08	0.85		5.84	2.41	1.99	0.85
147	Pyridine + 1-ethyl-3-methylimidazolium acetate	6.47	0.94		3.9	1.52	2.25	0.64
148	Pyridine + 1-methyl-3-octylimidazolium chloride	7.79	6.57		6.47	6.65	7.97	5.91
149	Pyridine + 1-hexyl-3-methylimidazolium chloride	6.8	5.71		6.25	7.11	8.78	5.98
150	Pyridine + 2-octylisoquinolinium bis((trifluoromethyl)sulfonyl)amide	8.21	5.41		12.3	8.27	7.06	5.04
151	Thiophene + 1-(3-hydroxypropyl)pyridinium tricyanomethanide	4.18	2.04		4.06	2.77	4.08	2.46
152	Thiophene + 1-(2-hydroxyethyl)pyridinium tricyanomethanide	4.79	1.75		15.91	11.74	6.63	2.85
153	Thiophene + 2-octylisoquinolinium bis((trifluoromethyl)sulfonyl)amide	8.06	4.05		23.07	12.47	10.59	4.69
154	Thiophene + 1-butyl-3-methylimidazolium thiocyanate	1.92	0.77		19.64	16	1.68	2.02
155	Thiophene + 1-butyl-3-methylimidazolium bis(trifluoromethylsulfonyl)imide	1.4	0.83		19.98	14.22	3.68	2.7
156	Dimethyl sulfoxide + 1-ethyl-3-methylimidazolium trifluoromethanesulfonate	2.14	1.24		3.22	2.41	2.47	2.08
157	Dimethyl sulfoxide + 1-hexyl-3-methylimidazolium tetrafluoroborate	3.13	2.28		5.8	3.3	4.26	3.28
158	Dimethyl sulfoxide + 1-ethyl-3-methylimidazolium acetate	3.67	1.23		2.69	0.94	0.94	0.84
159	Dimethyl sulfoxide + 1-methyl-3-octylimidazolium chloride	11.73	6.34		7.69	7.03	7.01	6.64
160	Dimethyl sulfoxide + 1-hexyl-3-methylimidazolium chloride	8.67	4.63		9.96	9.09	9.95	8.91
161	Dimethyl sulfoxide + 1-ethyl-3-methylimidazolium tetrafluoroborate	3.65	2.32		3.66	1.13	2.02	1.13
162	Dimethyl sulfoxide + trimethylammonium dihydrogen phosphate	1.29	1.12		3.09	2.21	0.81	0.45
163	Dimethyl sulfoxide + trimethylammonium acetate	7.86	1.44		0.89	1.7	3.5	0.46
164	Dimethyl sulfoxide + trimethylammonium hydrogen sulfate	6.83	1.66		5.7	4.64	2.11	0.46
165	Dimethyl sulfoxide + 1-butyl-3-methylimidazolium tetrafluoroborate	4.87	2.23		5.47	1.94	2.41	1.74
166	Dimethyl sulfoxide + diethylammonium hydrogen sulfate	3.67	2.75		8.99	6.59	2.87	2.46
167	Dimethyl sulfoxide + 1-butyl-2,3-dimethylimidazolium tetrafluoroborate	4.86	2.67		1.8	2.62	2.44	1.49
168	Dimethyl sulfoxide + triethylammonium acetate	1.18	0.58		10.69	6.96	2.83	0.34
169	Dimethyl sulfoxide + diethylammonium acetate	1.99	1.42		12.18	9.56	2.47	0.87
170	Dimethyl sulfoxide + 1-butyl-3-methylimidazolium bis(trifluoromethylsulfonyl)imide	2.99	1.67		7.02	2.04	3.05	1.99
171	Dimethyl sulfoxide + triethylammonium dihydrogen phosphate	2.6	1.2		16.8	13.27	4.3	0.98
172	Dimethyl sulfoxide + triethylammonium hydrogen sulfate	12.1	8.25		32.19	25.55	11.96	4.8
173	Dimethylformamide + 1-ethyl-3-methylimidazolium acetate	7.34	1.73		2.57	1.95	2.67	1.38
174	Dimethylformamide + 1-methyl-3-octylimidazolium chloride	5.87	3.5		5.22	3.13	6.29	2.55
175	Dimethylformamide + 1-hexyl-3-methylimidazolium chloride	8.51	6.26		5.3	5.36	8.54	5.67
176	Dimethylformamide + 1-butyl-3-methylimidazolium trifluoromethanesulfonate	3.64	2.32		6.35	6.07	5.08	2.24
177	Dimethylformamide + 1-butyl-3-methylimidazolium hexafluorophosphate	10.13	8.96		11.4	11.25	10.92	9.69
178	Dimethylformamide + 1-hexyl-1-methylpyrrolidinium bis(trifluoromethanesulfonyl)imide	2.95	1.6		6.38	5.38	6.31	5.21
179	Dimethylformamide + 1-ethyl-3-methylimidazolium tetrafluoroborate	2.27	0.49		3.16	0.89	1.21	0.29
180	Glycerol + dodecyltriethylphosphonium 2-cyanopyrrolide	6.66	6.23		17.83	14.37	11.82	9.62
181	Glycerol + butyltriethylphosphonium 2-cyanopyrrolide	8.56	3.5		11.72	11.34	12.07	7.42
182	Triethanolamine + tributyl(dodecyl)phosphonium 2-cyanopyrrolide	6.85	2.12		10.12	7.9	9.42	2.12
183	Triethanolamine + dodecyltriethylphosphonium 2-cyanopyrrolide	3.55	2.76		10.35	10.82	11.92	7.98
184	Triethanolamine + butyltriethylphosphonium 2-cyanopyrrolide	7.77	2.8		10.32	10.38	14.69	6.23
	Total:	5.66	2.82		13.58	6.79	6.17	3.41
	Median:	4.64	2.32		10.16	4.35	4.91	2.47
	Max:	26.65	9.53		62.38	48.49	26.17	15.48
